1 **A *trans*-complementation system for SARS-CoV-2**

2 Xianwen Zhang<sup>1,11</sup>, Yang Liu<sup>1,11</sup>, Jianying Liu<sup>2,3</sup>, Adam L. Bailey<sup>4</sup>, Kenneth S. Plante<sup>2,3,5</sup>, Jessica  
3 A. Plante<sup>2,3,5</sup>, Jing Zou<sup>1</sup>, Hongjie Xia<sup>1</sup>, Nathen Bopp<sup>6</sup>, Patricia Aguilar<sup>6</sup>, Ping Ren<sup>3,6</sup>, Vineet D.  
4 Menachery<sup>2,3</sup>, Michael S. Diamond<sup>4,7,8</sup>, Scott C. Weaver<sup>2,3,5,9</sup>, Xuping Xie<sup>1,3\*</sup>, Pei-Yong  
5 Shi<sup>1,3,9,10,12\*</sup>

6  
7 <sup>1</sup>Department of Biochemistry and Molecular Biology, University of Texas Medical Branch,  
8 Galveston TX, USA

9 <sup>2</sup>Department of Microbiology and Immunology, University of Texas Medical Branch, Galveston  
10 TX, USA

11 <sup>3</sup>Institute for Human Infections and Immunity, University of Texas Medical Branch, Galveston,  
12 TX, USA

13 <sup>4</sup>Department of Pathology & Immunology, Washington University School of Medicine, St. Louis,  
14 MO, USA

15 <sup>5</sup>World Reference Center for Emerging Viruses and Arboviruses, University of Texas Medical  
16 Branch, Galveston, TX, USA

17 <sup>6</sup>Department of Pathology, University of Texas Medical Branch, Galveston TX, USA

18 <sup>7</sup>Department of Medicine, Washington University School of Medicine, St. Louis, MO, USA

19 <sup>8</sup>Department of Molecular Microbiology, Washington University School of Medicine, St. Louis,  
20 MO, USA

21 <sup>9</sup>Sealy Institute for Vaccine Sciences, University of Texas Medical Branch, Galveston, TX, USA

22 <sup>10</sup>Sealy Center for Structural Biology & Molecular Biophysics, University of Texas Medical  
23 Branch, Galveston, TX, USA

24 <sup>11</sup>These authors contributed equally

25 <sup>12</sup>Lead Contact: Pei-Yong Shi

\*Correspondence: X.X. (xuxie@UTMB.edu) or P.-Y.S. (peshi@UTMB.edu)

26

27 **Keywords:** SARS-CoV-2, COVID-19, coronavirus, diagnosis, vaccine, antiviral

## 28 **ABSTRACT**

29           The biosafety level-3 (BSL-3) requirement to culture severe acute respiratory syndrome  
30 coronavirus 2 (SARS-CoV-2) is a bottleneck for research and countermeasure development.  
31 Here we report a *trans*-complementation system that produces single-round infectious SARS-  
32 CoV-2 that recapitulates authentic viral replication. We demonstrate that the single-round  
33 infectious SARS-CoV-2 can be used at BSL-2 laboratories for high-throughput neutralization  
34 and antiviral testing. The *trans*-complementation system consists of two components: a genomic  
35 viral RNA containing a deletion of ORF3 and envelope gene, and a producer cell line expressing  
36 the two deleted genes. *Trans*-complementation of the two components generates virions that  
37 can infect naive cells for only one round, but does not produce wild-type SARS-CoV-2.  
38 Hamsters and K18-hACE2 transgenic mice inoculated with the complementation-derived virions  
39 exhibited no detectable disease, even after intracranial inoculation with the highest possible  
40 dose. The results suggest that the *trans*-complementation platform can be safely used at BSL-2  
41 laboratories for research and countermeasure development.

42

## 43 **INTRODUCTION**

44           Three zoonotic betacoronaviruses have emerged to cause global epidemics or  
45 pandemics in less than twenty years: severe acute respiratory syndrome coronavirus (SARS-  
46 CoV) in 2002, Middle East respiratory syndrome coronavirus (MERS-CoV) in 2012, and SARS-  
47 CoV-2 in 2019 (1). The coronavirus disease 2019 (COVID-19) pandemic has caused  
48 unprecedented social and economic disruption. As of January 16, 2021, SARS-CoV-2 had  
49 infected over 94 million people, leading to over 2 million deaths  
50 (<https://www.worldometers.info/coronavirus/>). In response to the pandemic, the scientific  
51 community has rapidly developed experimental platforms to study COVID-19 and to develop  
52 countermeasures. Several groups have established infectious cDNA clones and reporter SARS-

53 CoV-2 to facilitate the development and analysis of first-generation vaccines and therapeutics  
54 (2-6). However, since SARS-CoV-2 is a biosafety level-3 (BSL-3) pathogen, the requirement of  
55 high containment represents a bottleneck for antiviral and vaccine evaluation. Thus, a BSL-2  
56 cell culture system that recapitulates authentic viral replication is urgently needed.

57 The genome of SARS-CoV-2 is a positive-sense, single-stranded RNA of approximately  
58 30 kb in length. The SARS-CoV-2 virion consists of an internal nucleocapsid [formed by the  
59 genomic RNA coated with nucleocapsid (N) proteins] and an external envelope [formed by a  
60 cell-derived bilipid membrane embedded with spike (S), membrane (M), and envelope (E)  
61 proteins] (7). The genomic RNA encodes open-reading-frames (ORFs) for replicase  
62 (ORF1a/ORF1b), S, E, M, and N proteins, as well as seven additional ORFs for accessory  
63 proteins (1). Stable cell lines containing replicons (self-replicating viral RNA genomes with one  
64 or more gene deletions) have been developed for many viruses, including coronaviruses (8-12).  
65 Because replicons lack structural genes, they are not infectious and can safely be manipulated  
66 in BSL-2 laboratories. For SARS-CoV-2, although a transient replicon system has been  
67 established (13), no stable replicon cell line has been reported. To overcome this gap, we have  
68 developed a single-round infectious SARS-CoV-2 through *trans*-complementation. The single-  
69 round SARS-CoV-2 is engineered with a reporter gene that facilitates high-throughput antiviral  
70 screening and neutralizing antibody measurement. We validated the safety of the system in cell  
71 cultures, hamsters, and highly susceptible human angiotensin-converting enzyme 2 (hACE2)  
72 transgenic mice. Our results suggest that the *trans*-complementation system can be used safely  
73 at BSL-2 laboratories.

74

## 75 **RESULTS**

76 **A single-round infectious SARS-CoV-2 system.** Fig. 1A depicts the *trans*-  
77 complementation system to produce single-round infectious SARS-CoV-2. The system contains

78 two components: (i) a viral RNA containing a mNeonGreen (mNG) reporter gene and a deletion  
79 of ORF3 and E genes ( $\Delta$ ORF3-E; **Fig. 1B**) and (ii) a Vero E6 cell line expressing the ORF3 and  
80 E proteins under a doxycycline inducible promoter (Vero-ORF3-E; **Fig. 1C-D**). Upon  
81 electroporation of  $\Delta$ ORF3-E RNA into Vero-ORF3-E cells and addition of doxycycline, *trans*-  
82 complementation enables production of virions that can continuously infect and amplify on Vero-  
83 ORF3-E cells; however, these virions can only infect normal cells for a single round due to the  
84 lack of ORF3 and E genes in the packaged RNA genome (**Fig. 1A**).

85 Our *trans*-complementation system is engineered with several safeguards to eliminate  
86 wild-type (WT) SARS-CoV-2 production. Besides the ORF3-E deletion, the  $\Delta$ ORF3-E viral RNA  
87 contained two additional modifications. (i) The transcription regulatory sequence (TRS) of  
88  $\Delta$ ORF3-E RNA was mutated from the WT ACGAAC to CCGGAT (mutant nucleotides  
89 underlined; **Fig. 1B**). Recombination between the TRS-mutated  $\Delta$ ORF3-E RNA with  
90 inadvertently contaminating viral RNA would therefore not produce replicative virus (14, 15). (ii)  
91 An mNG gene was engineered at ORF7 of  $\Delta$ ORF3-E RNA to facilitate the detection of viral  
92 replication (**Fig. 1B**). The *trans*-complementing Vero-ORF3-E cell lines were produced by  
93 transducing Vero E6 cells with a lentivirus encoding the following elements (**Fig. S1A**): a  
94 TRE3GS promoter that allows doxycycline to induce ORF3 and E protein expression (**Fig. 1C-D**  
95 **and S1B**); an mCherry gene that facilitates selection of cell lines with high levels of protein  
96 expression (**Fig. S1C**); a foot-and-mouth disease virus 2A (FMDV 2A) autocleavage site that  
97 enables translation of individual mCherry and viral E protein; and an encephalomyocarditis virus  
98 internal ribosomal entry site (EMCV IRES) that bicistronically translates the ORF3 protein. The  
99 above design eliminated overlapping sequences between the ORF3-E mRNA and  $\Delta$ ORF3-E  
100 viral RNA, thus minimizing homologous recombination during *trans*-complementation. The Vero-  
101 ORF3-E cell line stably expressed the engineered proteins after 20 rounds of passaging, as  
102 indicated by the mCherry reporter (**Fig. 1D**).

103 Electroporation of  $\Delta$ ORF3-E mNG RNA into doxycycline-induced Vero-ORF3-E cells  
104 produced virions of  $\sim 10^4$  median Tissue Culture Infectious Dose (TCID<sub>50</sub>)/ml titer (**Fig. 1E**). The  
105  $\Delta$ ORF3-E mNG virion exhibited a diameter of  $\sim 91$  nm under negative staining electron  
106 microscopy (**Fig. 1F**). The  $\Delta$ ORF3-E mNG virion produced in the supernatant could infect Vero-  
107 ORF3-E cells for multiple rounds, but for only one round on naïve Vero E6 (**Fig. 1G-H**), Calu-3,  
108 or hACE2-expressing A549 cells (A549-hACE2; **Fig. S2**). As controls, WT mNG SARS-CoV-2  
109 could infect cells for multiple rounds (**Fig. S2**). These results indicate that the *trans*-  
110 complementation system produces virions that can only infect WT cells for single round.

111 **Adaptive mutations to improve virion production.** To improve the efficiency of the  
112 *trans*-complementation platform, we serially propagated  $\Delta$ ORF3-E mNG virions on Vero-ORF3-  
113 E cells for 10 passages (3-4 days per passage) to select for adaptive mutations. The P10 virion  
114 replicated to higher titers than the P1 virion on Vero-ORF3-E cells (**Fig. 2A**), retained the mNG  
115 reporter (**Fig. 2B-C**), and still infected normal Vero cells for only single round (**Fig. S3**). Whole  
116 genome sequencing of the P10 virion revealed three mutations in the nsp1, nsp4, and S genes  
117 (**Fig. 2D**). Engineering of these mutations into  $\Delta$ ORF3-E mNG RNA showed that all three were  
118 required to enhance the *trans*-complementation efficiency, producing  $10^6$  TCID<sub>50</sub>/ml of virions  
119 (**Fig. 2A-B**). These results indicate that (i) adaptive mutations can be selected to improve the  
120 yield of single-round virions and (ii) WT virus is not produced from the *trans*-complementation  
121 system.

122 **Exclusion of WT SARS-CoV-2 production.** To confirm that no WT SARS-CoV-2 is  
123 inadvertently produced during *trans*-complementation, we performed four additional selections  
124 by passaging  $\Delta$ ORF3-E mNG virions on Vero-ORF3-E cells for five rounds. The P5 virions from  
125 selections I-III could only infect Vero cells for single round (**Fig. S4A-B**). Unexpectedly,  
126 selection IV produced P5 (S-IV-P5) virions that could infect parental Vero E6 cells for more than  
127 one round, though at a barely detectable level of  $\sim 10^2$  TCID<sub>50</sub>/ml, which was  $>100,000$ -fold

128 lower than the WT mNG SARS-CoV-2 titers (**Fig. S4C**). To remove the single-round virion from  
129 the multi-round virion in the S-IV-P5 stock, we passaged the S-IV-P5 virion stock on Vero E6  
130 cells for two rounds, resulting in S-IV-P5-Vero-P2 virion capable of multi-round infection. Full-  
131 genome sequencing revealed that the S-IV-P5-Vero-P2 virion retained the ORF3-E deletion but  
132 accumulated mutations in nsp15, nsp16, S, and M genes (**Fig. S4D**). Engineering the  
133 accumulated mutations into  $\Delta$ ORF3-E mNG RNA showed that the M mutation T130N conferred  
134 multi-round infection on Vero cells (**Fig. S4E**). Residue T130 is predicted to be on the intra-  
135 virion side of the M protein (16, 17), and is conserved in SARS-CoV and SARS-CoV-2 (**Fig.**  
136 **S4F**). The results indicate that, despite an absence of WT SARS-CoV-2 production and a lack  
137 of ORF and E genes, the *trans*-complementation system could produce mutant virions capable  
138 of infecting parental Vero cells for multiple rounds at a barely detectable level.

139 Next, we continuously cultured the S-IV-P5 variant on parental Vero E6 cells for 10  
140 rounds (3-4 days per round) to select for potential virions with improved replication efficiency.  
141 However, passage did not improve viral replication on Vero cells (**Fig. S5**). The result suggests  
142 that, due to the lack of ORF3 and E gene, the S-IV-P5 virion is unlikely to gain efficient multiple-  
143 round amplification on normal cells through adaptation.

144 **Safety evaluation of  $\Delta$ ORF3-E virions *in vivo*.** We examined the virulence of  $\Delta$ ORF3-  
145 E mNG virion in hamsters and K18-hACE2 transgenic mice (18-20). After intranasal inoculation  
146 with  $6 \times 10^5$  TCID<sub>50</sub> of  $\Delta$ ORF3-E mNG virion (the highest possible infecting dose; **Fig. 3A**),  
147 hamsters did not lose weight (**Fig. 3B**) or develop detectable disease (**Fig. 3C**). In contrast,  $10^5$   
148 TCID<sub>50</sub> of WT SARS-CoV-2-infected hamsters developed weight loss and mild disease (e.g.,  
149 ruffled fur). The  $\Delta$ ORF3-E mNG virion-infected hamsters contained low levels of viral RNA in  
150 nasal washes (**Fig. 3D**) and oral swabs (**Fig. 3E**). Viral RNA levels in the trachea and lungs  
151 from the  $\Delta$ ORF3-E virion-infected animals were 5,000- and 400-fold lower than those from the  
152 WT virus-infected hamsters, respectively (**Fig. 3F**). Next, we examined the S-IV-P5-Vero-P2

153 virion, capable of infecting Vero cells for multiple rounds, in hamsters. To maximize the infection  
154 dose of S-IV-P5-Vero-P2 virion, we amplified S-IV-P5-Vero-P2 on Vero-ORF3-E cells,  
155 producing a virion stock of  $5 \times 10^4$  TCID<sub>50</sub>/ml. After intranasal inoculation with  $5 \times 10^3$  TCID<sub>50</sub> of S-  
156 IV-P5-Vero-P2 virion (the highest possible dose), hamsters did not lose weight or develop  
157 detectable disease (**Fig. S6**). Collectively, the results indicate that both  $\Delta$ ORF3-E mNG virion  
158 and S-IV-P5-Vero-P2 virion are highly attenuated and do not disseminate or cause disease in  
159 hamsters.

160 To corroborate the hamster results, we tested  $\Delta$ ORF3-E mNG virion in more susceptible  
161 K18-hACE2 mice (**Fig. 3G**). After intranasal inoculation with  $3 \times 10^5$  TCID<sub>50</sub> of  $\Delta$ ORF3-E mNG  
162 virion (the highest possible dose), K18-hACE2 mice did not lose weight (**Fig. 3H**) or die (**Fig.**  
163 **3I**); in contrast, infection with  $2.5 \times 10^3$  TCID<sub>50</sub> of WT SARS-CoV-2 resulted in 25% weight loss  
164 and 67% lethality. To increase the stringency of the test, we inoculated K18-hACE2 mice by  
165 intracranial injection with  $6 \times 10^4$  TCID<sub>50</sub> of  $\Delta$ ORF3-E mNG virion (the highest possible dose); no  
166 morbidity (**Fig. 3J**) or mortality (**Fig. 3K**) was observed. In contrast, mice inoculated by the  
167 intracranial route with 500, 50, 5, and 1 TCID<sub>50</sub> of WT SARS-CoV-2 developed 100%, 25%,  
168 25%, and 0% mortality, respectively (**Fig. 3K**). Similar to the  $\Delta$ ORF3-E mNG virion, no morbidity  
169 or mortality was observed after mice were inoculated by the intranasal or intracranial route with  
170  $2.5 \times 10^3$  or  $5 \times 10^2$  TCID<sub>50</sub> of S-IV-P5-Vero-P2 virion, respectively (**Fig. S7**). Together, the results  
171 demonstrate that both single-round  $\Delta$ ORF3-E mNG virion and multiple-round S-IV-P5-Vero-P2  
172 virion lack virulence in K18-hACE2 mice.

173 **High-throughput neutralization and antiviral testing.** We adapted  $\Delta$ ORF3-E mNG  
174 virion for a high-throughput neutralization and antiviral assay. **Fig. 4A** outlines the assay  
175 scheme in a 96-well plate format. Neutralization titers of 18 convalescent sera from COVID-19  
176 patients were measured by two assays for comparison: the  $\Delta$ ORF3-E mNG virion assay and the  
177 gold standard plaque-reduction neutralization test (PRNT). The two assays produced

178 comparable 50% neutralization titers ( $NT_{50}$ ) for all specimens (**Table S1 and Fig. 4B-C**). In  
179 addition, the  $\Delta$ ORF3-E mNG virion assay could also be used to measure the 50% effective  
180 neutralizing concentration ( $EC_{50}$ ) for a monoclonal antibody against SARS-CoV-2 receptor-  
181 binding domain (RBD; **Fig. 4D**). Finally, using Remdesivir as a viral polymerase inhibitor, we  
182 evaluated the  $\Delta$ ORF3-E mNG virion assay for antiviral testing. Remdesivir exhibited a more  
183 potent  $EC_{50}$  on hACE2-A549 cells (0.27  $\mu$ M; **Fig. 4E**) than that on Vero cells (5.1  $\mu$ M; **Fig. 4F**).  
184 The  $EC_{50}$  discrepancy between the two cell types is likely due to different efficiencies in  
185 converting Remdesivir to its triphosphate form, as previously reported (3, 21). Collectively, the  
186 results demonstrate that the  $\Delta$ ORF3-E virion assay can be used for high-throughput  
187 neutralization testing and antiviral drug discovery.

188

## 189 **DISCUSSION**

190 We generated and characterized a *trans*-complementation system for SARS-CoV-2. The  
191 system produced a high yield of single-round infectious  $\Delta$ ORF3-E virion that could be used for  
192 neutralization and antiviral testing. An mNG reporter was introduced into the  $\Delta$ ORF3-E virion to  
193 indicate viral replication. Depending on research needs, other reporter genes, such as luciferase  
194 or GFP, could be engineered into the system. A reliable high-throughput neutralization assay is  
195 important for COVID-19 vaccine evaluation and for studying the kinetics of neutralizing antibody  
196 levels in post-vaccinated and naturally infected people (4, 22, 23). Three types of cell-based  
197 high-throughput neutralization assays currently are available: (i) pseudovirus assay, which  
198 expresses SARS-CoV-2 S protein alone on heterologous viruses, can be performed at BSL-2  
199 laboratories (24, 25); (ii) a reporter SARS-CoV-2 assay, which must be performed at BSL-3  
200 laboratories, represents authentic viral infection (3, 5, 6, 26); (iii) *bona fide* fully infectious SARS-  
201 CoV-2 by focus reduction neutralization test (24). The  $\Delta$ ORF3-E mNG virion combines the  
202 advantages of each assay type by recapitulating the authentic viral infection for a single round,



203 thus supporting its use at BSL2 laboratories. The  $\Delta$ ORF3-E mNG virion can be readily adapted  
204 to investigate vaccine-elicited neutralization against newly emerged SARS-CoV-2 isolates, such  
205 as the rapidly spreading United Kingdom and South African strains (27, 28), by swapping or  
206 mutating the S gene.

207 The *trans*-complementation system can also be used for high-throughput antiviral  
208 screening of large compound libraries. Infection of normal cells with  $\Delta$ ORF3-E mNG virion  
209 allows for screening of inhibitors of virus entry, genome translation, and RNA replication, but not  
210 virion assembly/release. In contrast, infection of Vero-ORF3-E cells with  $\Delta$ ORF3-E mNG virion  
211 can be used to identify inhibitors of all steps of SARS-CoV-2 infection cycle, including virion  
212 assembly and release; this system also allows selection for resistance to inhibitors for mode-of-  
213 action studies. In addition, the single-round  $\Delta$ ORF3-E virion could be developed as a safe  
214 vaccine platform, as previously reported for other coronaviruses (29, 30).

215 Our results support that the *trans*-complementation system can be performed safely in  
216 BSL-2 laboratories. (i) The system produced single-round infectious  $\Delta$ ORF3-E mNG virion that  
217 does not infect normal cells for multiple rounds and thus cannot spread *in vitro* or *in vivo*. (ii) The  
218 system did not produce WT virus, even after multiple independent selections. (iii) Although an  
219 adaptive mutation in M protein was selected to confer multi-round infection on normal cells, the  
220 replication level of such virion (*i.e.*, S-IV-P5-Vero-P2) was barely detectable, with infectious  
221 titers >100,000-fold lower than the WT SARS-CoV-2. The molecular mechanism of how S-IV-  
222 P5-Vero-P2 could infect cells for multiple rounds without the ORF3 and E proteins remains to be  
223 defined. Previous studies showed that deletion of both ORF3 and E genes was lethal for SARS-  
224 CoV (31). (iv) Continuous culturing of the S-IV-P5-Vero-P2 virion on naïve Vero cells did not  
225 improve viral replication. (v) When hamsters and K18-hACE2 mice were infected with the  
226 highest possible doses, neither  $\Delta$ ORF3-E mNG virion nor S-IV-P5-Vero-P2 virion caused  
227 morbidity or mortality. Even after intracranial infection with the highest possible dose, neither

228 virions caused detectable disease or death in the highly susceptible K18-hACE2 mice. If further  
229 safety improvement is needed, more accessory ORFs could be deleted from the  $\Delta$ ORF3-E  
230 mNG RNA as accessory proteins are not essential for viral replication (1).

231 One limitation of our study is the use of Vero E6 cells for constructing the Vero-ORF3-E  
232 cell line. When propagated on Vero E6 cells, SARS-CoV-2 could accumulate deletions at the  
233 furin cleavage site in the S protein (32, 33). This cleavage deletion affects the neutralization  
234 susceptibility of SARS-CoV-2 and possibly the route of entry into cells (34). Although we did not  
235 observe furin cleavage deletions when our  $\Delta$ ORF3-E mNG virion was passaged on Vero-ORF3-  
236 E cells, this possibility could be minimized or eliminated by using other cell lines, such as A549-  
237 hACE2 or Vero-TMPRSS2-hACE2 cells.

238 In summary, we have developed a *trans*-complementation system for SARS-CoV-2 that  
239 likely can be performed at BSL-2 laboratories for COVID-19 research and countermeasure  
240 development. Thus, the experimental system could be used by researchers in industry,  
241 academia, and government laboratories who lack access to a BSL-3 facility.

242

## 243 **METHODS**

244 **Cell lines.** Vero E6, Vero CCL-81, Calu-3, and HEK-293T cells were purchased from the  
245 American Type Culture Collection (ATCC) and cultured in high-glucose Dulbecco's modified  
246 Eagle's medium (DMEM) supplemented with 2 mM L-glutamine, 100 U/ml Penicillium-  
247 Streptomycin (P/S), and 10% fetal bovine serum (FBS; HyClone Laboratories, South Logan,  
248 UT). Vero-ORF3-E cells were maintained in DMEM medium supplemented with 2mM L-  
249 glutamine, 100 U/ml P/S, 10% FBS, 0.075% sodium bicarbonate, and 10  $\mu$ g/ml puromycin. The  
250 A549-hACE2 cells were generously provided by Shinji Makino (35) and grown in the culture

251 medium supplemented with 10  $\mu\text{g}/\text{mL}$  blasticidin and 10 mM HEPES at 37 °C with 5% CO<sub>2</sub>.

252 Medium and other supplements were purchased from Thermo Fisher Scientific (Waltham, MA).

253 **Hamsters.** Syrian golden hamsters (HsdHan:AURA strain) were purchased from Envigo.

254 Animals were housed in groups and fed standard chow diets. Hamster experiments were

255 performed as described previously (36). Briefly, 10<sup>5</sup> TCID<sub>50</sub> of WT SARS-CoV-2, 6×10<sup>5</sup> TCID<sub>50</sub>

256 of  $\Delta\text{ORF3-E}$  mNG virion, or 5×10<sup>3</sup> TCID<sub>50</sub> of S-IV-P5-Vero-P2 virion in 100  $\mu\text{l}$  volume were

257 inoculated into four- to five-week-old male Syrian golden hamsters via the intranasal route. The

258 S-IV-P5-Vero-P2 virion stock was prepared by two rounds of culturing of S-IV-P5 virion (**Fig.**

259 **S4A**) on Vero E6 cells (to remove single-round infectious virion), followed by propagation on

260 Vero-ORF3-E cells. Fourteen hamsters were used in SARS-CoV-2- and  $\Delta\text{ORF3-E}$  mNG virion-

261 infected groups and 5 hamsters were used in S-IV-P5-Vero-P2 virion-infected group. From day

262 1 to 14 post-infection, hamsters were observed daily for weight change and signs of illness. Five

263 hamsters in WT SARS-CoV-2-,  $\Delta\text{ORF3-E}$  mNG virions-, or mock-infected group were sacrificed

264 on day 2 post-infection for lung and trachea collections. Nasal washes and oral swabs of the

265 rest 9 hamsters per group were collected on days 2, 4, and 7 post-infection.

266 **Mice.** Animal studies were carried out in accordance with the recommendations in the

267 Guide for the Care and Use of Laboratory Animals of the National Institutes of Health. The

268 protocols were approved by the Institutional Animal Care and Use Committee at the Washington

269 University School of Medicine (assurance number A3381–01). Heterozygous K18-hACE

270 c57BL/6J mice (strain: 2B6.Cg-Tg(K18-ACE2)2PrImn/J) were obtained from the Jackson

271 Laboratory. Animals were randomized upon arrival at Washington University and housed in

272 groups of <5 per cage in rooms maintained between 68-74°F with 30-60% humidity and

273 day/night cycles of 12 h intervals (on 6AM-6PM). Mice were fed standard chow diets. Mice 7-9

274 weeks of age and of both sexes were used for this study. Intranasal virus inoculations (50

275  $\mu\text{L}/\text{mouse}$ ) were performed under sedation with ketamine hydrochloride and xylazine while

276 intracranial virus inoculations (10  $\mu$ L/mouse) were performed under sedation with isoflurane; all  
277 efforts were made to minimize animal suffering.

278 **Plasmid construction.** Seven previously reported subclone plasmids for the assembly  
279 of the entire genome of SARS-CoV-2 were used in this study, including pUC57-F1, pCC1-F2,  
280 pCC1-F3, pUC57-F4, pUC57-F5, pUC57-F6, and pCC1-F7-mNG (2, 26). For the convenience  
281 of deleting ORF3-E gene, we constructed F5, F6, and F7-mNG fragments into one plasmid. F5,  
282 F6, and F7-mNG fragments were amplified from corresponding subclones via PCR with primer  
283 pairs pcov-F56-F1/pncov-R5, pncov-F6/pncov-R6, and pncov-F7/pncov-R8, respectively (**Table**  
284 **S2**). All PCR products were cloned together into a pCC1 vector through NotI and ClaI restriction  
285 sites using the standard restriction digestion-ligation cloning, resulting in subclone pCC1-F567-  
286 mNG.

287 To introduce ORF3-E deletion and mutant Transcription Regulatory Sequence (TRS)  
288 into pCC1-F567-mNG, seven fragments were amplified with primer pairs cov-21115-F/TRS2-S-  
289 R, TRS2-S-F/S-TRS2-M-R, TRS2-M-F/M-TRS2-R, M-TRS2-F/ORF6-TRS2-mNG-R, ORF6-  
290 TRS2-mNG-F/ORF7-TRS2-ORF8-R, ORF7-TRS2-ORF8-F/ORF8-TRS2-N-R, and TRS2-N-  
291 F/cov-28501-R. The seven PCR products were assembled into the pCC1-F567-mNG plasmid  
292 that were pre-linearized with NheI and XhoI by using the NEBuilder® HiFi DNA Assembly kit  
293 (NEB) according to the manufacturer's instruction, resulting in subclone pCC1-F567-mNG-  
294  $\Delta$ ORF3-E. Mutation T130N in M protein was engineered into pCC1-F567-mNG- $\Delta$ ORF3-E with  
295 primers M-T130N-F/M-T130N-R via overlap PCR. Mutant TRS was engineered into pCC1-F1  
296 with primers 5'UTR-TRS2-F and 5'UTR-TRS2-R via overlap PCR.

297 For making the Vero-ORF3-E cell lines, codon-optimized SARS-CoV-2 ORF3 and E  
298 genes were synthesized by GenScript Biotech (Piscataway, NJ). An mCherry reporter Zika virus  
299 cDNA plasmid (37) was used as a template to amplify the mCherry-F2A gene. For constructing  
300 a lentiviral plasmid expressing ORF3 and E protein of SARS-CoV-2, DNA fragments encoding  
301 mCherry-F2A, SARS-CoV-2 E, EMCV IRES, and SARS-CoV-2 ORF3 were amplified with

302 primers EcoR1-mCherry-F/F2A-optE-R, F2A-optE-F/EcoR1-Cov-optE-R, EcoR1-IRES-F/EMCV-  
303 IRES-R, and IRES-optORF3-F/BamH1-Cov-optORF3-R, respectively. The PCR products then  
304 were inserted into a Tet-on inducible lentiviral vector pLVX (Takara, Mountain View, CA)  
305 through EcoRI and BamHI restriction sites, resulting in plasmid pLVX-ORF3-E.

306 **Selection of Vero-ORF3-E cell line.** For packaging the lentivirus, the pLVX-ORF3-E  
307 plasmid was transfected into HEK-293T cells using the Lenti-X Packaging Single Shots kit  
308 (Takara). Lentiviral supernatants were harvested at 72 h post-transfection and filtered through a  
309 0.22  $\mu$ M membrane (Millipore, Burlington, MA). One day before transduction, Vero E6 cells were  
310 seeded in a 6-well plate ( $4 \times 10^5$  per well) with DMEM containing 10% FBS. After 12-18 h, cells  
311 were transduced with 2 ml lentivirus for 24 h in the presence of 12  $\mu$ g/ml of polybrene (Sigma-  
312 Aldrich, St. Louis, MO). At 24 h post-transduction, cells from a single well were split into four 10  
313 cm dishes and cultured in medium supplemented with 25  $\mu$ g/ml of puromycin. The culture  
314 medium containing puromycin was refreshed every 2 days. After 2-3 weeks of selection, visible  
315 puromycin-resistant cell colonies were formed. Several colonies were transferred into 24-well  
316 plates. When confluent, cells were treated with trypsin and seeded in 6-well plates for further  
317 expansion. The resulting cells were defined as Vero-ORF3-E P0 cells. For cell line verification,  
318 total cellular mRNA was isolated and subject to RT-PCR with primers EcoR1-mCherry-F and  
319 BamH1-Cov-optORF3-R (**Table S2**), followed by cDNA sequencing of the ORF3-E genes.

320  **$\Delta$ ORF3-E mNG cDNA assembly and *in vitro* RNA transcription.** Full-length genome  
321 assembly and RNA transcription were performed as described previously with minor  
322 modifications (2). Briefly, individual subclones containing fragments of the  $\Delta$ ORF3-E mNG viral  
323 genome were digested with appropriated restriction endonucleases and resolved in a 0.8%  
324 agarose gel. Specifically, the plasmids containing F1, F2, F3, or F4 fragments were digested  
325 with BsaI enzyme, and the plasmid containing F567-mNG- $\Delta$ ORF3-E fragment was digested  
326 with EspI enzyme. All fragments were recovered using the QIAquick Gel Extraction Kit  
327 (QIAGEN, Hilden, Germany), and total of 5  $\mu$ g of the five fragments was ligated in an equal

328 molar ratio by T4 DNA ligase (New England Biolabs, Ipswich, MA) at 4°C overnight. Afterward,  
329 the assembled full-length genomic cDNA was purified by phenol-chloroform extraction and  
330 isopropanol precipitation.  $\Delta$ ORF3-E mNG RNA transcripts were generated using the T7  
331 mMessage mMachine kit (Ambion, Austin, TX). To synthesize the N gene RNA transcript of  
332 SARS-CoV-2, the N gene was PCR-amplified by primers CoV-T7-N-F and polyT-N-R (**Table**  
333 **S2**) from a plasmid containing the F7 fragment (2); the PCR product was then used for *in vitro*  
334 transcription using the T7 mMessage mMachine kit (Ambion).

335  **$\Delta$ ORF3-E mNG virion production and quantification.** Vero-ORF3-E cells were  
336 seeded in a T175 flask and grown in DMEM medium with 100 ng/ml of doxycycline. On the next  
337 day, 40  $\mu$ g of  $\Delta$ ORF3-E mNG RNA and 20  $\mu$ g of N-gene RNA were electroporated into  $8 \times 10^6$   
338 Vero-ORF3-E cells using the Gene Pulser XCell electroporation system (Bio-Rad, Hercules,  
339 CA) at a setting of 270V and 950  $\mu$ F with a single pulse. The electroporated cells were then  
340 seeded in a T75 flask and cultured in the medium supplemented with doxycycline (Sigma-  
341 Aldrich) at 37°C for 3-4 days. Virion infectivity was quantified by measuring the TCID<sub>50</sub> using an  
342 end-point dilution assay as previously reported (38). Briefly, Vero-ORF3-E cells were plated on  
343 96-well plates ( $1.5 \times 10^4$  per well) one day prior to infection. The cells were cultured in medium  
344 with doxycycline as described above.  $\Delta$ ORF3-E mNG virions were serially diluted in DMEM  
345 medium supplemented with 2% FBS, with 6 replicates per concentration. Cells were infected  
346 with 100  $\mu$ l of diluted virions and incubated at 37°C for 2-3 days. The mNG signals were  
347 counted under a fluorescence microscope (Nikon, Tokyo, Japan). TCID<sub>50</sub> was calculated using  
348 the Reed & Muench method (39).

349 To assess viral RNA levels, a quantitative RT-PCR assay was conducted using an iTaq  
350 Universal SYBR Green one-step kit (Bio-Rad) on a QuantStudio 7 Flex Real-Time PCR  
351 Systems (Thermo fisher) by following the manufacturers' protocols. Primers CoV19-N2-F and  
352 CoV19-N2-R (**Table S2**) targeting the N gene were used. Absolute RNA copies were

353 determined by standard curve method using *in vitro* transcribed RNA containing genomic  
354 nucleotide positions 26,044 to 29,883 of the SARS-CoV-2 genome.

355 **RNA extraction, RT-PCR, and cDNA sequencing.** Supernatants of infected cells were  
356 collected and centrifuged at 1,000 g for 10 min to remove cell debris. Clarified culture fluids (250  
357  $\mu$ l) were mixed thoroughly with 1 ml of TRIzol LS reagent (Thermo Fisher Scientific).  
358 Extracellular RNA was extracted per manufacture's instruction and resuspended in 20  $\mu$ l of  
359 nuclease-free water. RT-PCR was performed using the SuperScript® IV One-Step RT-PCR kit  
360 (Thermo Fisher Scientific). Nine cDNA fragments (gF1 to gF9) covering the whole viral genome  
361 were generated with specific primers according to the protocol described previously (2).  
362 Afterward, cDNA fragments were separated in a 0.8% agarose gel, purified using QIAquick Gel  
363 Extraction Kit (QIAGEN), and subjected to Sanger sequencing.

364  **$\Delta$ ORF3-E mNG virion neutralization assay.** The research protocol for use of human  
365 serum specimens was approved by the University of Texas Medical Branch (UTMB) Institutional  
366 Review Board (IRB protocol number 20-0070). All human serum specimens were obtained at  
367 the UTMB with patient information de-identified. For neutralization testing, Vero CCL-81 cells  
368 ( $1.2 \times 10^4$ ) in 50  $\mu$ l of DMEM containing 2% FBS and 100 U/ml P/S were seeded in each well of  
369 black  $\mu$ CLEAR flat-bottom 96-well plate (Greiner Bio-one™, Kremsmünster, Austria). At 16 h  
370 post-seeding, 30  $\mu$ L of 2-fold serial diluted human sera were mixed with 30  $\mu$ L of  $\Delta$ ORF3-E  
371 mNG virion (MOI of 5) and incubated at 37°C for 1 h. Afterward, 50  $\mu$ L of virus-sera complexes  
372 were transferred to each well of the 96-well plate. After incubating the infected cells at 37°C for  
373 20 h, 25  $\mu$ l of Hoechst 33342 Solution (400-fold diluted in Hank's Balanced Salt Solution;  
374 Thermo Fisher Scientific) were added to each well to stain the cell nucleus. The plate was  
375 sealed with Breath-Easy sealing membrane (Diversified Biotech, Dedham, MA), incubated at  
376 37°C for 20 min, and quantified for mNG-positive cells using the CellInsight CX5 High-Content  
377 Screening Platform (Thermo Fisher Scientific). Infection rates were determined by dividing the  
378 mNG-positive cell number to the total cell number. Relative infection rates were obtained by

379 normalizing the infection rates of serum-treated groups to those of non-serum-treated controls.  
380 The curves of the relative infection rates versus the serum dilutions (log<sub>10</sub> values) were plotted  
381 using Prism 9 (GraphPad, San Diego, CA). A nonlinear regression method was used to  
382 determine the dilution fold that neutralized 50% of mNG fluorescence (NT<sub>50</sub>). Each serum was  
383 tested in duplicates.

384 **ΔORF3-E mNG virion for mAb and antiviral testing.** Vero CCL-81 cells (1.2×10<sup>4</sup>) or  
385 A549-hACE2 cells in 50 μl of culture medium containing 2% FBS were seeded in each well of  
386 black μCLEAR flat-bottom 96-well plate. At 16 h post-seeding, 2- or 3-fold serial diluted human  
387 mAb14 (40) or Remdesivir were mixed with ΔORF3-E mNG virion (MOI of 1). Fifty microliters of  
388 mixtures were transferred to each well of the 96-well plate. After incubating the infected cells at  
389 37°C for 20 h, 25 μl of Hoechst 33342 Solution (400-fold diluted in Hank's Balanced Salt  
390 Solution) were added to each well to stain the cell nucleus. The plate was sealed with Breath-  
391 Easy sealing membrane, incubated at 37°C for 20 min. mNG-positive cells were quantified and  
392 infection rates were calculated as described above. Relative infection rates were obtained by  
393 normalizing the infection rates of treated groups to those of non-treated controls. For  
394 Remdesivir, 0.1% of DMSO-treated groups were used as controls. A nonlinear regression  
395 method was used to determine the concentration that inhibited 50% of mNG fluorescence  
396 (EC<sub>50</sub>). Experiments were performed in triplicates or quadruplicates.

397 **Biosafety.** All aspects of this study were approved by the Institutional Biosafety  
398 Committee of the University of Texas Medical Branch at Galveston before the initiation of this  
399 study. Experiments with SARS-CoV-2, *trans*-complementation, and ΔORF3-E mNG virion were  
400 performed in a BSL-3 laboratory by personnel equipped with powered air-purifying respirators.

401 **Transmission Electron Microscopy.** Supernatants of infected cells were centrifuged  
402 for 10 min at 3,000 g to remove cellular debris. Nickel grids were incubated with clarified  
403 supernatants for 10 min followed by glutaraldehyde fixation and 2% uranyl acetate staining.



404 Micrographs were taken using a JEM 1400 (JEOL USA Inc.). Multiple randomly selected fields  
405 were imaged.

406 **Bioinformatics analysis.** Fluorescence images were processed using ImageJ (41).  
407 Virus sequences were download from the NCBI database and aligned using Geneious software.  
408 DNA gel images were analyzed using Image Lab software. Statistical graphs or charts were  
409 created using the GraphPad Prism 9 software. Figures were created and assembled using  
410 BioRender and Adobe illustration (San Jose, CA).

411 **Statistical analysis.** A linear regression model in the software Prism 9 (GraphPad) was  
412 used to calculate the NT<sub>50</sub> and EC<sub>50</sub> values from the ΔORF3-E virion assay. Pearson  
413 correlation coefficient and two-tailed p-value are calculated using the default settings in the  
414 software Prism 9. An unpaired T-test (for two-groups comparison) and ANOVA test (for multi-  
415 group comparison) were used in statistical analysis (\*, P<0.05, significant; \*\*, P<0.01, very  
416 significant; \*\*\*, P<0.001, highly significant; \*\*\*\*, P<0.0001, extremely significant; ns, P>0.05, not  
417 significant).

418

## 419 DATA AVAILABILITY

420 The results presented in the study are available upon request from the corresponding  
421 authors. The mNG reporter SARS-CoV-2 has been deposited to the World Reference Center for  
422 Emerging Viruses and Arboviruses (<https://www.utmb.edu/wrceva>) at UTMB for distribution.

423

## 424 REFERENCES

425

- 426 1. B. Hu, H. Guo, P. Zhou, Z. L. Shi, Characteristics of SARS-CoV-2 and COVID-19. *Nat*  
427 *Rev Microbiol*, (2020).
- 428 2. X. Xie *et al.*, An Infectious cDNA Clone of SARS-CoV-2. *Cell Host Microbe* 27, 841-848  
429 e843 (2020).
- 430 3. X. Xie *et al.*, A nanoluciferase SARS-CoV-2 for rapid neutralization testing and screening  
431 of anti-infective drugs for COVID-19. *Nat Commun* 11, 5214 (2020).
- 432 4. M. J. Mulligan *et al.*, Phase I/II study of COVID-19 RNA vaccine BNT162b1 in adults.  
433 *Nature* 586, 589-593 (2020).

- 434 5. Y. J. Hou *et al.*, SARS-CoV-2 Reverse Genetics Reveals a Variable Infection Gradient in  
435 the Respiratory Tract. *Cell* 182, 1–18 (2020).
- 436 6. T. Thi Nhu Thao *et al.*, Rapid reconstruction of SARS-CoV-2 using a synthetic genomics  
437 platform. *Nature* 582, 561-565 (2020).
- 438 7. H. Yao *et al.*, Molecular Architecture of the SARS-CoV-2 Virus. *Cell* 183, 730-738 e713  
439 (2020).
- 440 8. F. Ge, Y. Luo, P. X. Liew, E. Hung, Derivation of a novel SARS-coronavirus replicon cell  
441 line and its application for anti-SARS drug screening. *Virology* 360, 150-158 (2007).
- 442 9. A. A. Khromykh, E. G. Westaway, Subgenomic replicons of the flavivirus Kunjin:  
443 construction and applications. *J. Virol.* 71, 1497-1505 (1997).
- 444 10. V. Lohmann *et al.*, Replication of subgenomic hepatitis C virus RNAs in a hepatoma cell  
445 line. *Science* 285, 110-113 (1999).
- 446 11. L. Lo, M. Tilgner, P.-Y. Shi, A potential high-throughput assay for screening inhibitors of  
447 West Nile virus replication. *J. Virol.* 77, 12901-12906 (2003).
- 448 12. T. Hertzog *et al.*, Rapid identification of coronavirus replicase inhibitors using a selectable  
449 replicon RNA. *J Gen Virol* 85, 1717-1725 (2004).
- 450 13. H. Xia *et al.*, Evasion of Type I Interferon by SARS-CoV-2. *Cell Rep* 33, 108234 (2020).
- 451 14. R. L. Graham, D. J. Deming, M. E. Deming, B. L. Yount, R. S. Baric, Evaluation of a  
452 recombination-resistant coronavirus as a broadly applicable, rapidly implementable  
453 vaccine platform. *Commun Biol* 1, 179 (2018).
- 454 15. B. Yount, R. S. Roberts, L. Lindesmith, R. S. Baric, Rewiring the severe acute  
455 respiratory syndrome coronavirus (SARS-CoV) transcription circuit: engineering a  
456 recombination-resistant genome. *Proc Natl Acad Sci U S A* 103, 12546-12551 (2006).
- 457 16. R. Mahtarin *et al.*, Structure and dynamics of membrane protein in SARS-CoV-2. *J*  
458 *Biomol Struct Dyn*, 1-14 (2020).
- 459 17. S. Thomas, The Structure of the Membrane Protein of SARS-CoV-2 Resembles the  
460 Sugar Transporter SemiSWEET. *Pathog Immun* 5, 342-363 (2020).
- 461 18. E. S. Winkler *et al.*, SARS-CoV-2 infection of human ACE2-transgenic mice causes  
462 severe lung inflammation and impaired function. *Nat Immunol* 21, 1327-1335 (2020).
- 463 19. J. F. Chan *et al.*, Simulation of the clinical and pathological manifestations of  
464 Coronavirus Disease 2019 (COVID-19) in golden Syrian hamster model: implications for  
465 disease pathogenesis and transmissibility. *Clin Infect Dis*, (2020).
- 466 20. P. B. McCray, Jr. *et al.*, Lethal infection of K18-hACE2 mice infected with severe acute  
467 respiratory syndrome coronavirus. *J Virol* 81, 813-821 (2007).
- 468 21. A. J. Pruijssers *et al.*, Remdesivir Inhibits SARS-CoV-2 in Human Lung Cells and  
469 Chimeric SARS-CoV Expressing the SARS-CoV-2 RNA Polymerase in Mice. *Cell Rep*  
470 32, 107940 (2020).
- 471 22. E. E. Walsh *et al.*, Safety and Immunogenicity of Two RNA-Based Covid-19 Vaccine  
472 Candidates. *N Engl J Med*, (2020).
- 473 23. A. T. Widge *et al.*, Durability of Responses after SARS-CoV-2 mRNA-1273 Vaccination.  
474 *N Engl J Med*, (2020).
- 475 24. J. B. Case *et al.*, Neutralizing Antibody and Soluble ACE2 Inhibition of a Replication-  
476 Competent VSV-SARS-CoV-2 and a Clinical Isolate of SARS-CoV-2. *Cell Host Microbe*  
477 28, 475-485 e475 (2020).
- 478 25. C. Zeng *et al.*, Neutralizing antibody against SARS-CoV-2 spike in COVID-19 patients,  
479 health care workers, and convalescent plasma donors. *JCI Insight* 5, (2020).
- 480 26. A. E. Muruato *et al.*, A high-throughput neutralizing antibody assay for COVID-19  
481 diagnosis and vaccine evaluation. *Nat Commun* 11, 4059 (2020).
- 482 27. K. Kupferschmidt, Fast-spreading U.K. virus variant raises alarms. *Science* 371, 9-10  
483 (2021).

- 484 28. Xie, X. *et al.*, Neutralization of N501Y mutant SARS-CoV-2 by BNT162b2 vaccine-  
485 elicited sera. *BioRxiv*, doi: <https://doi.org/10.1101/2021.1101.1107.425740> (2021).
- 486 29. F. Almazan *et al.*, Engineering a replication-competent, propagation-defective Middle  
487 East respiratory syndrome coronavirus as a vaccine candidate. *mBio* 4, e00650-00613  
488 (2013).
- 489 30. J. Ortego, D. Escors, H. Laude, L. Enjuanes, Generation of a replication-competent,  
490 propagation-deficient virus vector based on the transmissible gastroenteritis coronavirus  
491 genome. *J Virol* 76, 11518-11529 (2002).
- 492 31. C. Castano-Rodriguez *et al.*, Role of Severe Acute Respiratory Syndrome Coronavirus  
493 Viroporins E, 3a, and 8a in Replication and Pathogenesis. *mBio* 9, (2018).
- 494 32. S. Y. Lau *et al.*, Attenuated SARS-CoV-2 variants with deletions at the S1/S2 junction.  
495 *Emerg Microbes Infect* 9, 837-842 (2020).
- 496 33. W. B. Klimstra *et al.*, SARS-CoV-2 growth, furin-cleavage-site adaptation and  
497 neutralization using serum from acutely infected hospitalized COVID-19 patients. *J Gen  
498 Virol* 101, 1156-1169 (2020).
- 499 34. B. A. Johnson *et al.*, Furin Cleavage Site Is Key to SARS-CoV-2 Pathogenesis. *bioRxiv*,  
500 (2020).
- 501 35. E. C. Mossel *et al.*, Exogenous ACE2 expression allows refractory cell lines to support  
502 severe acute respiratory syndrome coronavirus replication. *J Virol* 79, 3846-3850 (2005).
- 503 36. J. A. Plante *et al.*, Spike mutation D614G alters SARS-CoV-2 fitness. *Nature*, (2020).
- 504 37. C. Shan *et al.*, A live-attenuated Zika virus vaccine candidate induces sterilizing  
505 immunity in mouse models. *Nat Med*, (2017).
- 506 38. B. D. Lindenbach, Measuring HCV infectivity produced in cell culture and in vivo.  
507 *Methods Mol Biol* 510, 329-336 (2009).
- 508 39. L. J. Reed, H. Muench, A simple method of estimating fifty percent endpoints. *The  
509 American Journal of Hygiene* 27, 493–497 (1938).
- 510 40. Z. Ku *et al.*, Molecular determinants and mechanism for antibody cocktail preventing  
511 SARS-CoV-2 escape. *Nature Communications*, [https://doi.org/10.1038/s41467-41020-  
512 20789-41467](https://doi.org/10.1038/s41467-41020-20789-41467) (2021).
- 513 41. C. A. Schneider, W. S. Rasband, K. W. Eliceiri, NIH Image to ImageJ: 25 years of image  
514 analysis. *Nat Methods* 9, 671-675 (2012).
- 515

## 516 ACKNOWLEDGEMENTS

517 We thank John Bilello from Gilead for providing Remdesivir and Zhiqiang An from the  
518 University of Texas Health Science at Houston for providing mAb14. P.-Y.S. was supported by  
519 NIH grants AI142759, AI134907, AI145617, and UL1TR001439; awards from the Sealy & Smith  
520 Foundation, Kleberg Foundation, John S. Dunn Foundation, Amon G. Carter Foundation, Gilson  
521 Longenbaugh Foundation, and Summerfield Robert Foundation; and fund in sponsored  
522 research agreement from Q<sup>2</sup> Solutions. M.S.D. was supported by R01 AI157155. V.D.M. was  
523 supported by NIH grants U19AI100625, R00AG049092, R24AI120942, and a STARs Award  
524 from the University of Texas System. S.C.W. was supported by NIH grant R24 AI120942. J.L. is

525 supported by the postdoctoral fellowship from the McLaughlin Fellowship Endowment at  
526 UTMB. P.R. and X.X. were partially supported by the Sealy & Smith Foundation.

527

## 528 **AUTHOR CONTRIBUTIONS**

529 X.Z., V.D.M., X.X., and P.-Y.S conceived the study. X.Z., Y.L., J.L., A.L.B., K.S.P.,  
530 J.A.P., J.Z., H.X., N.B., P.R., and X.X. performed the experiments. X.Z., Y.L., A.L.B., P.A., P.R.,  
531 V.D.M., M.S.D., S.W., X.X., and P.-Y.S. analyzed the results. P.R. prepared the serum  
532 specimens. X.Z., Y.L., A.L.B., V.D.M., M.S.D., S.W., X.X., and P.-Y.S wrote the manuscript.

533

## 534 **COMPETING INTERESTS**

535 X.Z., X.X., and P.-Y.S. have filed a patent on the trans-complementation system of  
536 SARS-CoV-2. M.S.D. is a consultant for Inbios, Vir Biotechnology, NGM Biopharmaceuticals,  
537 and Carnival Corporation, and on the Scientific Advisory Boards of Moderna and Immunome.  
538 The Diamond laboratory has received unrelated funding support in sponsored research  
539 agreements from Moderna, Vir Biotechnology, and Emergent BioSolutions.

540 **FIGURE LEGENDS**

541  
542 **Figure 1. Generation of single-round infectious  $\Delta$ ORF3-E mNG virion (A)** A *trans*-  
543 complementation system for SARS-CoV-2. Vero-ORF3-E cells are electroporated with  $\Delta$ ORF3-  
544 E mNG RNA. *Trans*-complementation produces  $\Delta$ ORF3-E mNG virion (*left panel*) which can  
545 infect naïve Vero E6 cells for only single round (*right panel*). **(B)**  $\Delta$ ORF3-E mNG virion genome.  
546 Both the full-length mNG SARS-CoV-2 genome (*top panel*) and the  $\Delta$ ORF3-E mNG virion  
547 genome (*bottom panel*) are shown. The genomic fragment 8 (gF8) of RT-PCR analysis are  
548 indicated above both genomes. The ORF3-E deletion junction is indicated. The WT and mutant  
549 Transcription Regulatory Sequences (TRS) are also depicted. **(C)** ORF3-E RNA expression in  
550 Vero-ORF3-E cells. Doxycycline (Dox) was used to induce the expression of ORF3-E RNA. RT-  
551 PCR analyses were performed on Vero-ORF3-E cells with or without doxycycline induction as  
552 well as on naïve Vero E6 cells. **(D)** Induction of mCherry expression in Vero-ORF3-E cells.  
553 Passage 1 (P1) and 20 (P20) of Vero-ORF3-E cells were induced by doxycycline to express  
554 mCherry fluorescence. Scale bar, 100  $\mu$ m. **(E)** Production of  $\Delta$ ORF3-E mNG virion after  
555 electroporation. After electroporating  $\Delta$ ORF3-E mNG RNA into Vero-ORF3-E cells (with  
556 doxycycline), infectious titers of  $\Delta$ ORF3-E mNG virion were measured from culture medium.  
557 Three sets of repeated experiments are presented with bars representing standard deviations.  
558 **(F)** Negative-staining electron microscopic image of  $\Delta$ ORF3-E mNG virion. Scale bar, 50 nm.  
559 **(G)** Analysis of  $\Delta$ ORF3-E mNG virion infection. Vero E6 or Vero-ORF3-E cells were incubated  
560 with WT mNG SARS-CoV-2 or  $\Delta$ ORF3-E mNG virion for 2 h. The cells were washed three times  
561 with PBS to remove residual input virus. At 48 h post-infection, the supernatants of the infected  
562 cells were transferred to fresh Vero E6 or Vero-ORF3-E cells for a second round of infection.  
563 The mNG signals from both rounds of infected cells are presented. Scale bar, 100  $\mu$ m. **(H)** RT-  
564 PCR analysis. Extracellular RNA from the second-round infection from **(G)** was harvested at 48  
565 h post-infection. Fragment 8 of the viral genome, depicted in **(B)**, was amplified by RT-PCR to  
566 confirm the ORF3-E deletion and mNG retention.

567  
568 **Figure 2. Adaptive mutations to improve the yield of  $\Delta$ ORF3-E mNG virion production. (A)**  
569 Viral replication kinetics on Vero-ORF3-E cells. Adaptive mutations **(D)** were selected by  
570 continuously passaging the  $\Delta$ ORF3-E virion on Vero-ORF3-E cells for 10 rounds. For  
571 comparing the replication kinetics of the passaged viruses, Vero-ORF3-E cells were infected  
572 with the P1 or P10  $\Delta$ ORF3-E virion,  $\Delta$ ORF3-E virion containing an S mutation in **(D)** [ $\Delta$ ORF3-E  
573 virion mut-S], or  $\Delta$ ORF3-E virion containing all adaptive mutations in nsp1, nsp4, and S in **(D)**  
574 [ $\Delta$ ORF3-E virion mut-All] at an MOI of 0.15. WT mNG SARS-CoV-2 was included as a control.  
575 Viral titers in culture supernatants are presented. ANOVA with multiple comparison correction  
576 test were performed with \*,  $P < 0.05$ ; \*\*,  $P < 0.01$ . **(B)** mNG-positive cells at 24 and 48 h post-  
577 infection from **(A)**. Scale bar, 100  $\mu$ m. **(C)** RT-PCR analysis for single-round infection. For  
578 confirming the P10  $\Delta$ ORF3-E virion remains infectious for only a single round on Vero cells,  
579 Vero E6 or Vero-ORF3-E cells were infected with WT mNG SARS-CoV-2 or P10  $\Delta$ ORF3-E  
580 mNG virion for two rounds as described in **Fig. 1G**. Viral RNAs were extracted from the second-  
581 round culture fluids and analyzed by RT-PCR. The RT-PCR product, fragment 8 (gF8), is  
582 indicated in **Fig. 1B**. **(D)** Adaptive mutations. Three mutations were identified from whole  
583 genome sequencing of P10  $\Delta$ ORF3-E mNG virion. No mutation was found in the P1  $\Delta$ ORF3-E  
584 mNG virion.

585  
586 **Figure 3. Safety characterization of  $\Delta$ ORF3-E mNG virion in animal models. (A)** Hamster  
587 experimental schedule. Four- to five-week-old male Syrian golden hamsters were intranasally  
588 (I.N.) inoculated with  $10^5$  TCID<sub>50</sub> of WT SARS-CoV-2,  $6 \times 10^5$  TCID<sub>50</sub> of  $\Delta$ ORF3-E mNG virion, or  
589 PBS mock control. Hamsters were monitored for weight loss, disease, and viral RNA level. **(B)**  
590 Hamster weight change (n=9). **(C)** Hamster disease (n=9). **(D)** Hamster nasal wash viral RNA

591 level (n=9). **(E)** Hamster oral swab viral RNA level (n=9). **(F)** Viral RNA loads in hamster trachea  
592 and lung at day 2 post-infection (n=5). Limit of detection (L.O.D.) was defined as the RNA  
593 copies detected from mock-infected hamster samples. The weight loss data are shown as mean  
594  $\pm$  standard deviation and statistically analyzed using two-way ANOVA Turkey's multiple  
595 comparison. The genomic RNA levels are presented as mean  $\pm$  standard error of the mean and  
596 analyzed by Mann-Whitney test. \*, P<0.05; \*\*, P<0.01; \*\*\*, P<0.001; \*\*\*\*, P<0.0001. **(G)** Mouse  
597 experimental schedule. Seven- to nine-week-old K18-hACE2 mice were inoculated with WT  
598 SARS-CoV-2 or  $\Delta$ ORF3-E mNG virion via the intranasal (I.N.) or intracranial (I.C.) route. Mouse  
599 weight loss after I.N. **(H)** or I.C. **(J)** infection. Body weights were normalized to the initial weight.  
600 The means for each group [I.N: WT SARS-CoV-2 (n=9),  $\Delta$ ORF3-E mNG virion (n=4), and mock  
601 (n=4); I.C: WT SARS-CoV-2 500 TCID<sub>50</sub> (n=4), 50 TCID<sub>50</sub> (n=5), 5 TCID<sub>50</sub> (n=5), and 1 TCID<sub>50</sub>  
602 (n=5) and  $6 \times 10^4$  TCID<sub>50</sub>  $\Delta$ ORF3-E mNG virus (n=4)] are indicated, with error bars indicating the  
603 standard deviation. A mixed-model ANOVA using Dunnett's test for multiple comparisons was  
604 used to evaluate the statistical significance among groups: \*, P<0.05; \*\*, P<0.01; \*\*\*, P<0.001;  
605 \*\*\*\*, P<0.0001. Mouse survival after I.N. **(I)** and I.C. **(K)** inoculation was analyzed using the  
606 Gehan-Breslow-Wilcoxon test. Using groups with 100% survival as a comparator, a Bonferroni  
607 correction was applied manually to adjust the threshold for significance (indicated by \*).  
608

609 **Figure 4.  $\Delta$ ORF3-E mNG virion-based high-throughput neutralization and antiviral**  
610 **testing.** **(A)** Assay scheme in a 96-well format. **(B)** Correlation analysis of NT<sub>50</sub> values between  
611 the  $\Delta$ ORF3-E mNG virion assay and plaque-reduction neutralization test (PRNT). The Pearson  
612 correlation efficiency R<sup>2</sup> and P values (two-tailed) are indicated. **(C)** Neutralization curves.  
613 Representative curves are presented for one negative and three positive sera. The means and  
614 standard deviations from two independent experiments are shown. **(D)** EC<sub>50</sub> of human mAb14  
615 against  $\Delta$ ORF3-E mNG virion infecting Vero CCL81 cells. The mean  $\pm$  standard deviations from  
616 four independent experiments are indicated. **(E)** EC<sub>50</sub> of Remdesivir against  $\Delta$ ORF3-E mNG  
617 virion infecting A549-hACE2 cells. **(F)** EC<sub>50</sub> of Remdesivir against  $\Delta$ ORF3-E mNG virion on  
618 Vero CCL81 cells. For **(E)** and **(F)**, the mean  $\pm$  standard deviations from three independent  
619 experiments are indicated. The four-parameter dose-response curve was fitted using the  
620 nonlinear regression method.  
621

## 622 SUPPLEMENTAL FIGURE LEGENDS

623  
624 **Figure S1. Construction of Vero-ORF3-E cell lines.** **(A)** Construction of a lentiviral transfer  
625 plasmid encoding mCherry, ORF3, and E protein. The sequence of FMDV 2A and its  
626 translational break position is indicated by an arrow. **(B)** Merged mCherry (red) and nuclei (blue)  
627 images of 3 selected clones of Vero-ORF3-E cell lines. Nuclei were stained with Hoechst  
628 33342. Doxycycline induction is indicated. **(C)** mCherry expression in doxycycline-induced cells.  
629 mCherry-positive cells were quantified using a plate reader. The percentages of mCherry  
630 positive cells are presented. The results are presented as means  $\pm$  standard deviations from six  
631 replicates, and more than 10<sup>5</sup> cells were counted for each clone. Clone 1 was used in the rest of  
632 this study.  
633

634 **Figure S2. Single-round infection of  $\Delta$ ORF3-E mNG virion.** **(A)** Calu-3 and A549-hACE2  
635 cells (MOI of 1 and 10 for mNG SARS-CoV-2 and  $\Delta$ ORF3-E mNG virion, respectively; viral titers  
636 determined on Vero-ORF3-E cells) were infected with mNG SARS-CoV-2 or  $\Delta$ ORF3-E mNG  
637 virion for 2 h, after which the cells were washed and cultured in fresh medium. At day 2 post-  
638 infection, supernatants of the infected cells were transferred to infect naïve Calu-3 and A549-  
639 hACE2 for the second round. Fluorescence and phase contrast images for the infected cells are  
640 presented. **(B)** RT-PCR analysis of viral RNA. Extracellular RNAs from the second round of

641 infection from (A) were harvested at day 2 post-infection and subjected to RT-PCR analysis of  
642 viral RNA.

643  
644 **Figure S3. No WT mNG SARS-CoV-2 production from the *trans*-complementation system.**  
645 WT mNG SARS-CoV-2 and P10  $\Delta$ ORF3-E mNG virion (derived from 10 rounds of passaging of  
646  $\Delta$ ORF3-E mNG virion on Vero-ORF3-E cells) were used to infect Vero E6 cells for two rounds  
647 as described in Fig. 1G. (A) Fluorescence and phase contrast images of infected cells are  
648 presented for both the first and second rounds of infections. (B) RT-PCR analysis of viral RNA  
649 extracted from the culture fluids from the second-round infected cells.

650  
651 **Figure S4. Selection of  $\Delta$ ORF3-E mNG virion capable of inefficiently infecting Vero E6**  
652 **cells for more than one round.** Four independently selected P5  $\Delta$ ORF3-E mNG virions  
653 (generated from five rounds of passaging  $\Delta$ ORF3-E mNG virion on Vero-ORF3-E cells) were  
654 used to infect naïve Vero E6 cells for two rounds as described in Fig. 1G. The P5  $\Delta$ ORF3-E  
655 mNG virion-infected Vero E6 cells were analyzed for mNG signals (A). The extracellular RNA  
656 from the second-round infected cells were examined for viral RNA by RT-PCR (B). Selection IV  
657 P5  $\Delta$ ORF3-E (S-IV-P5) mNG virion could infect Vero cells for multiple rounds. To remove the  
658 single-round virion from the multi-round virion in the S-IV-P5 stock, the S-IV-P5 stock was  
659 passaged on Vero E6 cells for two rounds, resulting in S-IV-P5-Vero-P2 virion capable of multi-  
660 round infection. The replication kinetics of WT mNG SARS-CoV-2 and S-IV-P5-Vero-P2 mNG  
661 virion were compared on Vero E6 cells (C). The cells were inoculated at an MOI of 0.001. Limit  
662 of detection, L.O.D. Adaptive mutations were identified from the S-IV-P5-Vero-P2 mNG virion  
663 (D). The T130N mutation from the M protein was engineered into  $\Delta$ ORF3-E mNG virion. The  
664 resulting  $\Delta$ ORF3-E mNG M T130N virion was used to infect Vero E6 cells for two rounds.  
665 Fluorescence and phase contrast images of the infected cells are shown (E). Sequence  
666 alignment shows that the M proteins from SARS-CoV and SARS-CoV-2 share the same T130  
667 residue (F). Red arrow indicates the T130 residue of SARS-CoV-2.

668  
669 **Figure S5. No improvement of viral replication of selection IV  $\Delta$ ORF3-E (S-IV-P5) mNG**  
670 **virion after 10 rounds of culturing on Vero E6 cells.** S-IV-P5 mNG virion was continuously  
671 passaged on Vero E6 cells for 10 rounds. The resulting P2 and P10 S-IV-P5 mNG virions (*i.e.*,  
672 S-IV-P5-Vero-P2 and S-IV-P5-Vero-P10, respectively) were used to infect Vero E6 cells at an  
673 MOI of 0.001. The mNG-positive cells (A) and the growth kinetics of the S-IV-P5-Vero-P2 and  
674 S-IV-P5-Vero-P10 virions (B) were compared. We did not use the S-IV-P5-Vero-P1 virion in this  
675 experiment because the P1 stock retained some carryover virions derived from the Vero-ORF3-  
676 E *trans*-complementation culture. Viral titers were analyzed by unpaired T-test. ns,  $P > 0.05$ .

677  
678 **Figure S6. Safety characterization of S-IV-P5-Vero-P2 virion in hamsters.** The weight  
679 change (A) and disease (B) of hamsters ( $n=5$ ) that were intranasally infected with 5,000 TCID<sub>50</sub>  
680 of S-IV-P5-Vero-P2 virion. A high-titer stock of S-IV-P5-Vero-P2 virion used for this experiment  
681 was prepared by amplifying the virion on Vero-ORF3-E cells.

682  
683 **Figure S7. Safety analysis of S-IV-P5-Vero-P2 virion in K18-hACE transgenic mice.** Seven-  
684 to nine-week-old K18-hACE2 mice were inoculated with S-IV-P5-Vero-P2 virion via the  
685 intranasal (I.N.) or intracranial (I.C.) route. Mouse body weight and survival were monitored for  
686 14 days. (A) Mouse weight loss after I.N. infection. Mice were infected with 2,500 TCID<sub>50</sub> of S-  
687 IV-P5-Vero-P2 virion ( $n=4$ ) or PBS mock ( $n=4$ ) via the I.N. route. The mean  $\pm$  standard  
688 deviations are indicated. (B) Mouse survival after I.N. infection. (C) Mouse weight loss after I.C.  
689 infection. Mouse were inoculated with 500 TCID<sub>50</sub> of S-IV-P5-Vero-P2 virion ( $n=4$ ) via the I.C.  
690 route. The mean  $\pm$  standard deviations are indicated. (D) Mouse survival after I.C. infection. A

691 high titer stock of S-IV-P5-Vero-P2 virion used for this experiment was prepared by amplifying  
692 the virion on Vero-ORF3-E cells.  
693



694 **Table S1. Comparison of neutralization titers between  $\Delta$ ORF3-E mNG virion and**  
695 **PRNT assays**  
696

| Serum ID | $\Delta$ ORF3-E virion-<br>NT <sub>50</sub> | PRNT <sub>50</sub> |
|----------|---------------------------------------------|--------------------|
| 1        | <20                                         | <20                |
| 2        | <20                                         | <20                |
| 3        | 59                                          | 80                 |
| 4        | 81                                          | 80                 |
| 5        | 169                                         | 160                |
| 6        | 225                                         | 200                |
| 7        | 274                                         | 320                |
| 8        | 353                                         | 320                |
| 9        | 370                                         | 320                |
| 10       | 392                                         | 320                |
| 11       | 394                                         | 400                |
| 12       | 568                                         | 320                |
| 13       | 585                                         | 800                |
| 14       | 666                                         | 400                |
| 15       | 677                                         | 640                |
| 16       | 744                                         | 320                |
| 17       | 909                                         | 800                |
| 18       | 925                                         | 640                |
| 19       | 1196                                        | 800                |
| 20       | 1789                                        | 1600               |

697  
698

699 **Table S2. Primers for plasmids construction and RT-PCR analysis**  
700

| Primer name          | Sequences (5' to 3')                                            |
|----------------------|-----------------------------------------------------------------|
| pcov-F56-F1          | TATACGAAGTTATATTCGATGCGGCCGCGTCTCAGAGTGCTTTGGTTTAT<br>GATAATAAG |
| pncov-R5             | TCGCACTAGAATAAACTCTGAACTC                                       |
| pncov-F6             | AGTTCAGAGTTTATTCTAGTGCGAATAATTGCACTTTTGAATATG                   |
| pncov-R6             | ATGGCTAGTGTAAGTCAAGAATACCAC                                     |
| pncov-F7             | GTATTCTTGCTAGTTACTAGCCATCCTTACTGCGCTTCG                         |
| pncov-R8             | AGGTCGACTCTAGAGGATCC                                            |
| cov-21115-F          | CATTTGTGGGTTTATACAACAAAAG                                       |
| TRS2-S-R             | GAAAAACAACATTATCCGGTTAGTTGTTAACAAG                              |
| TRS2-S-F             | CTTGTTAACAATAACCGGATAATGTTTGTTC                                 |
| S-TRS2-M-R           | GAAAACTAATAATAATTTAATCCGGTTATGTGTAATGTAATTTGACTCC<br>TTTGAGC    |
| TRS2-M-F             | CCGGATTAATATTATATTAGTTTTCTG                                     |
| M-TRS2-R             | GTAATAAGAAAGCGTCCGGGATGTAGCAACAGTG                              |
| M-TRS2-F             | CACTGTTGCTACATCCCGGACGCTTTCTTATTAC                              |
| ORF6-TRS2-<br>mNG-R  | CTTTGCTCACCATATCCGGTTAATCAATCTCC                                |
| ORF6-TRS2-<br>mNG-F  | GGAGATTGATTAACCGGATATGGTGAGCAAAG                                |
| ORF7-TRS2-<br>ORF8-R | CAAGAAATTTTCATATCCGGTTAGGCGTGACAAG                              |
| ORF7-TRS2-<br>ORF8-F | CTTGTCACGCCTAACCGGATATGAAATTTCTTG                               |
| ORF8-TRS2-<br>N-R    | CATTATCAGACATTTTAGTTTATCCGGTTAGATGAAATCTAAAACAACACG<br>AACGTC   |
| TRS2-N-F             | CCGGATAAACTAAAATGTCTGATAATGG                                    |
| cov-28501-R          | GGTGTTAATTGGAACGCCTTGTC                                         |
| M-T130N-F            | CCATGGCACTATTCTGAACAGACCGCTTCTAGAAAG                            |
| M-T130N-R            | CTTTCTAGAAGCGGTCTGTTTCAGAATAGTGCCATGG                           |
| 5'UTR-<br>TRS2-F     | GATCTGTTCTCTAACCGGATTTTAAAATCTGTGTG                             |
| 5'UTR-<br>TRS2-R     | CACACAGATTTTAAAATCCGGTTAGAGAACAGATC                             |
| EcoR1-<br>mCherry-F  | CACTTCCTACCCTCGTAAAGAATTCGCCACCATGGTGAGCAAGGGCGAG<br>GAG        |
| F2A-optE-R           | GACACAAAAGAATACATTGGCCAGGGTTGGACTCGAC                           |
| F2A-optE-F           | CCCTGGGCCAATGTATTCTTTTGTGTCTGAAG                                |
| EcoR1-Cov-<br>optE-R | GGGGAGGGAGAGGGGCGGGAATTCCTACACCAGCAGGTCTGGGGACC                 |
| EcoR1-<br>IRES-F     | TAGGAATTCGCGCCCTCTCCCTCCCCC                                     |
| EMCV-IRES-<br>R      | ATTATCATCGTGTTTTCAAAGGAAAACCACG                                 |
| IRES-<br>optORF3-F   | GTTTTCTTTGAAAACACGATGATAATATGGACCTGTTTCATGAGAATC                |
| BamH1-Cov-           | CTCGCAGGGGAGGTGGTCTGGATCCCTCACAGAGGAACAGATGTGGTG                |

|            |                                                 |
|------------|-------------------------------------------------|
| optORF3-R  | G                                               |
| CoV-T7-N-F | ACTGTAATACGACTCACTATAGGATGTCTGATAATGGACCCCAAATC |
| polyT-N-R  | (T) <sub>37</sub> AGGCCTGAGTTGAGTCAGCAC         |
| CoV19-N2-F | TTACAAACATTGGCCGCAAA                            |
| CoV19-N2-R | GCGCGACATTCCGAAGAA                              |

701

**Figure 1**

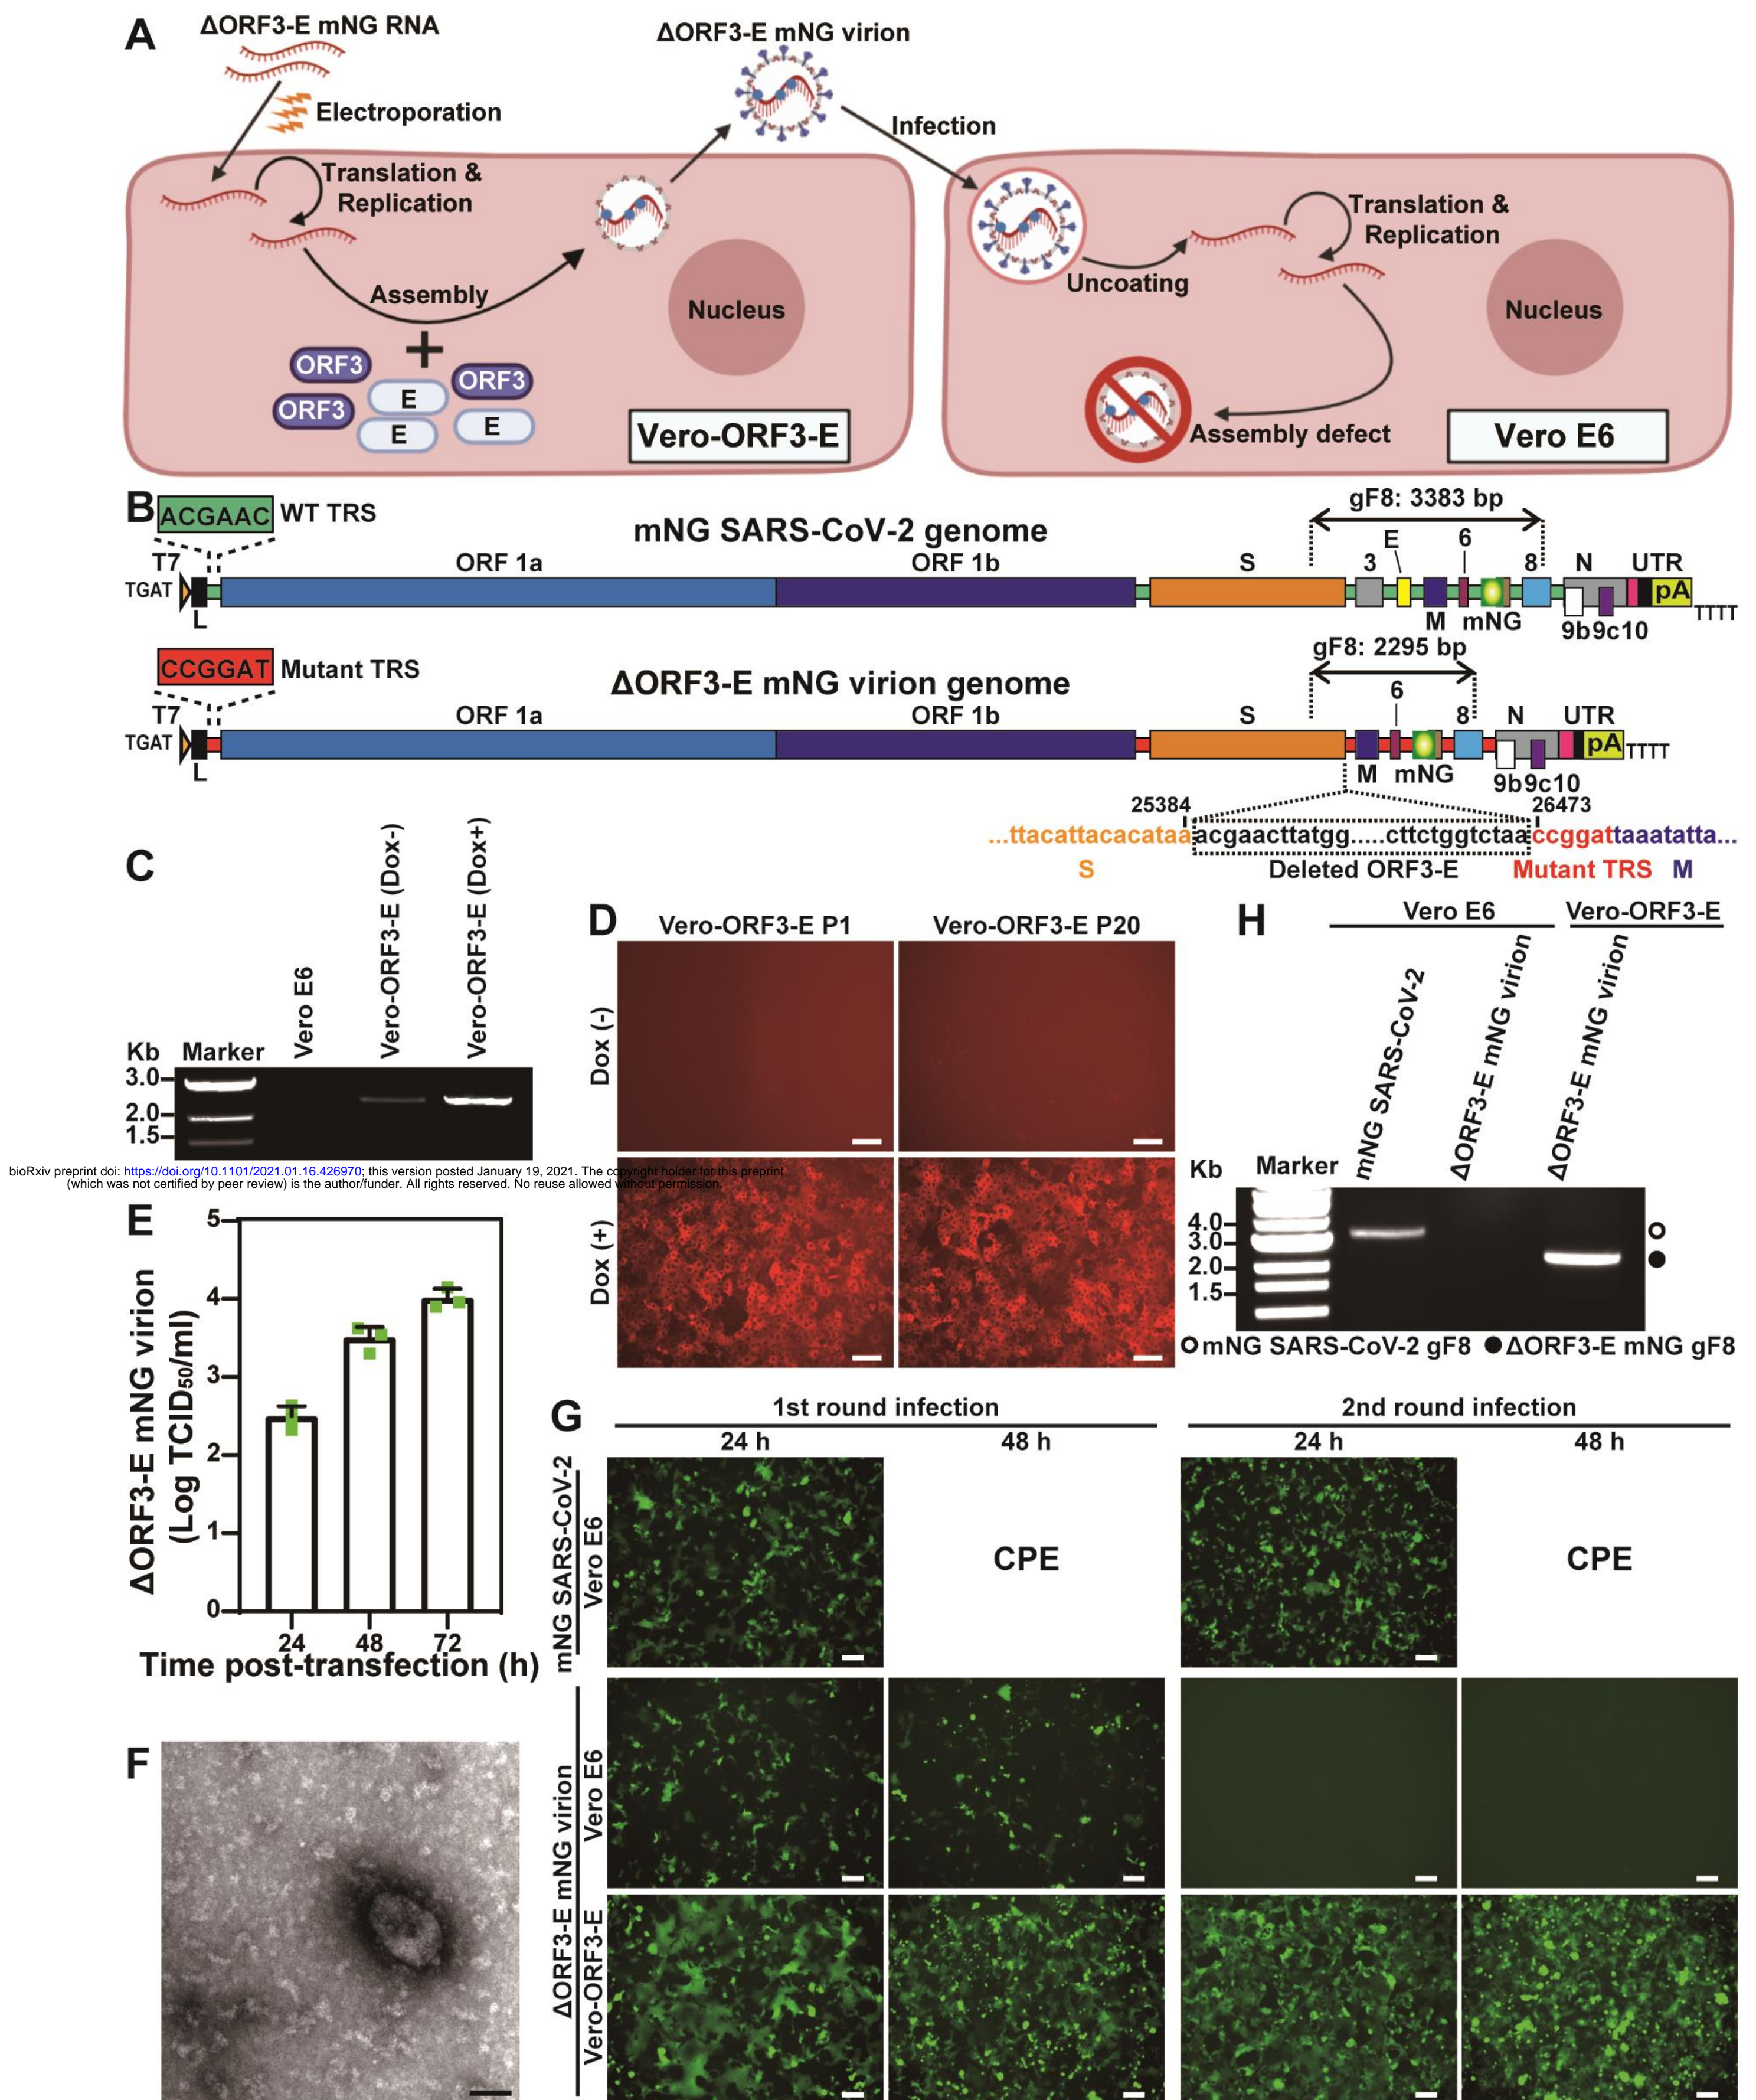

Figure 2

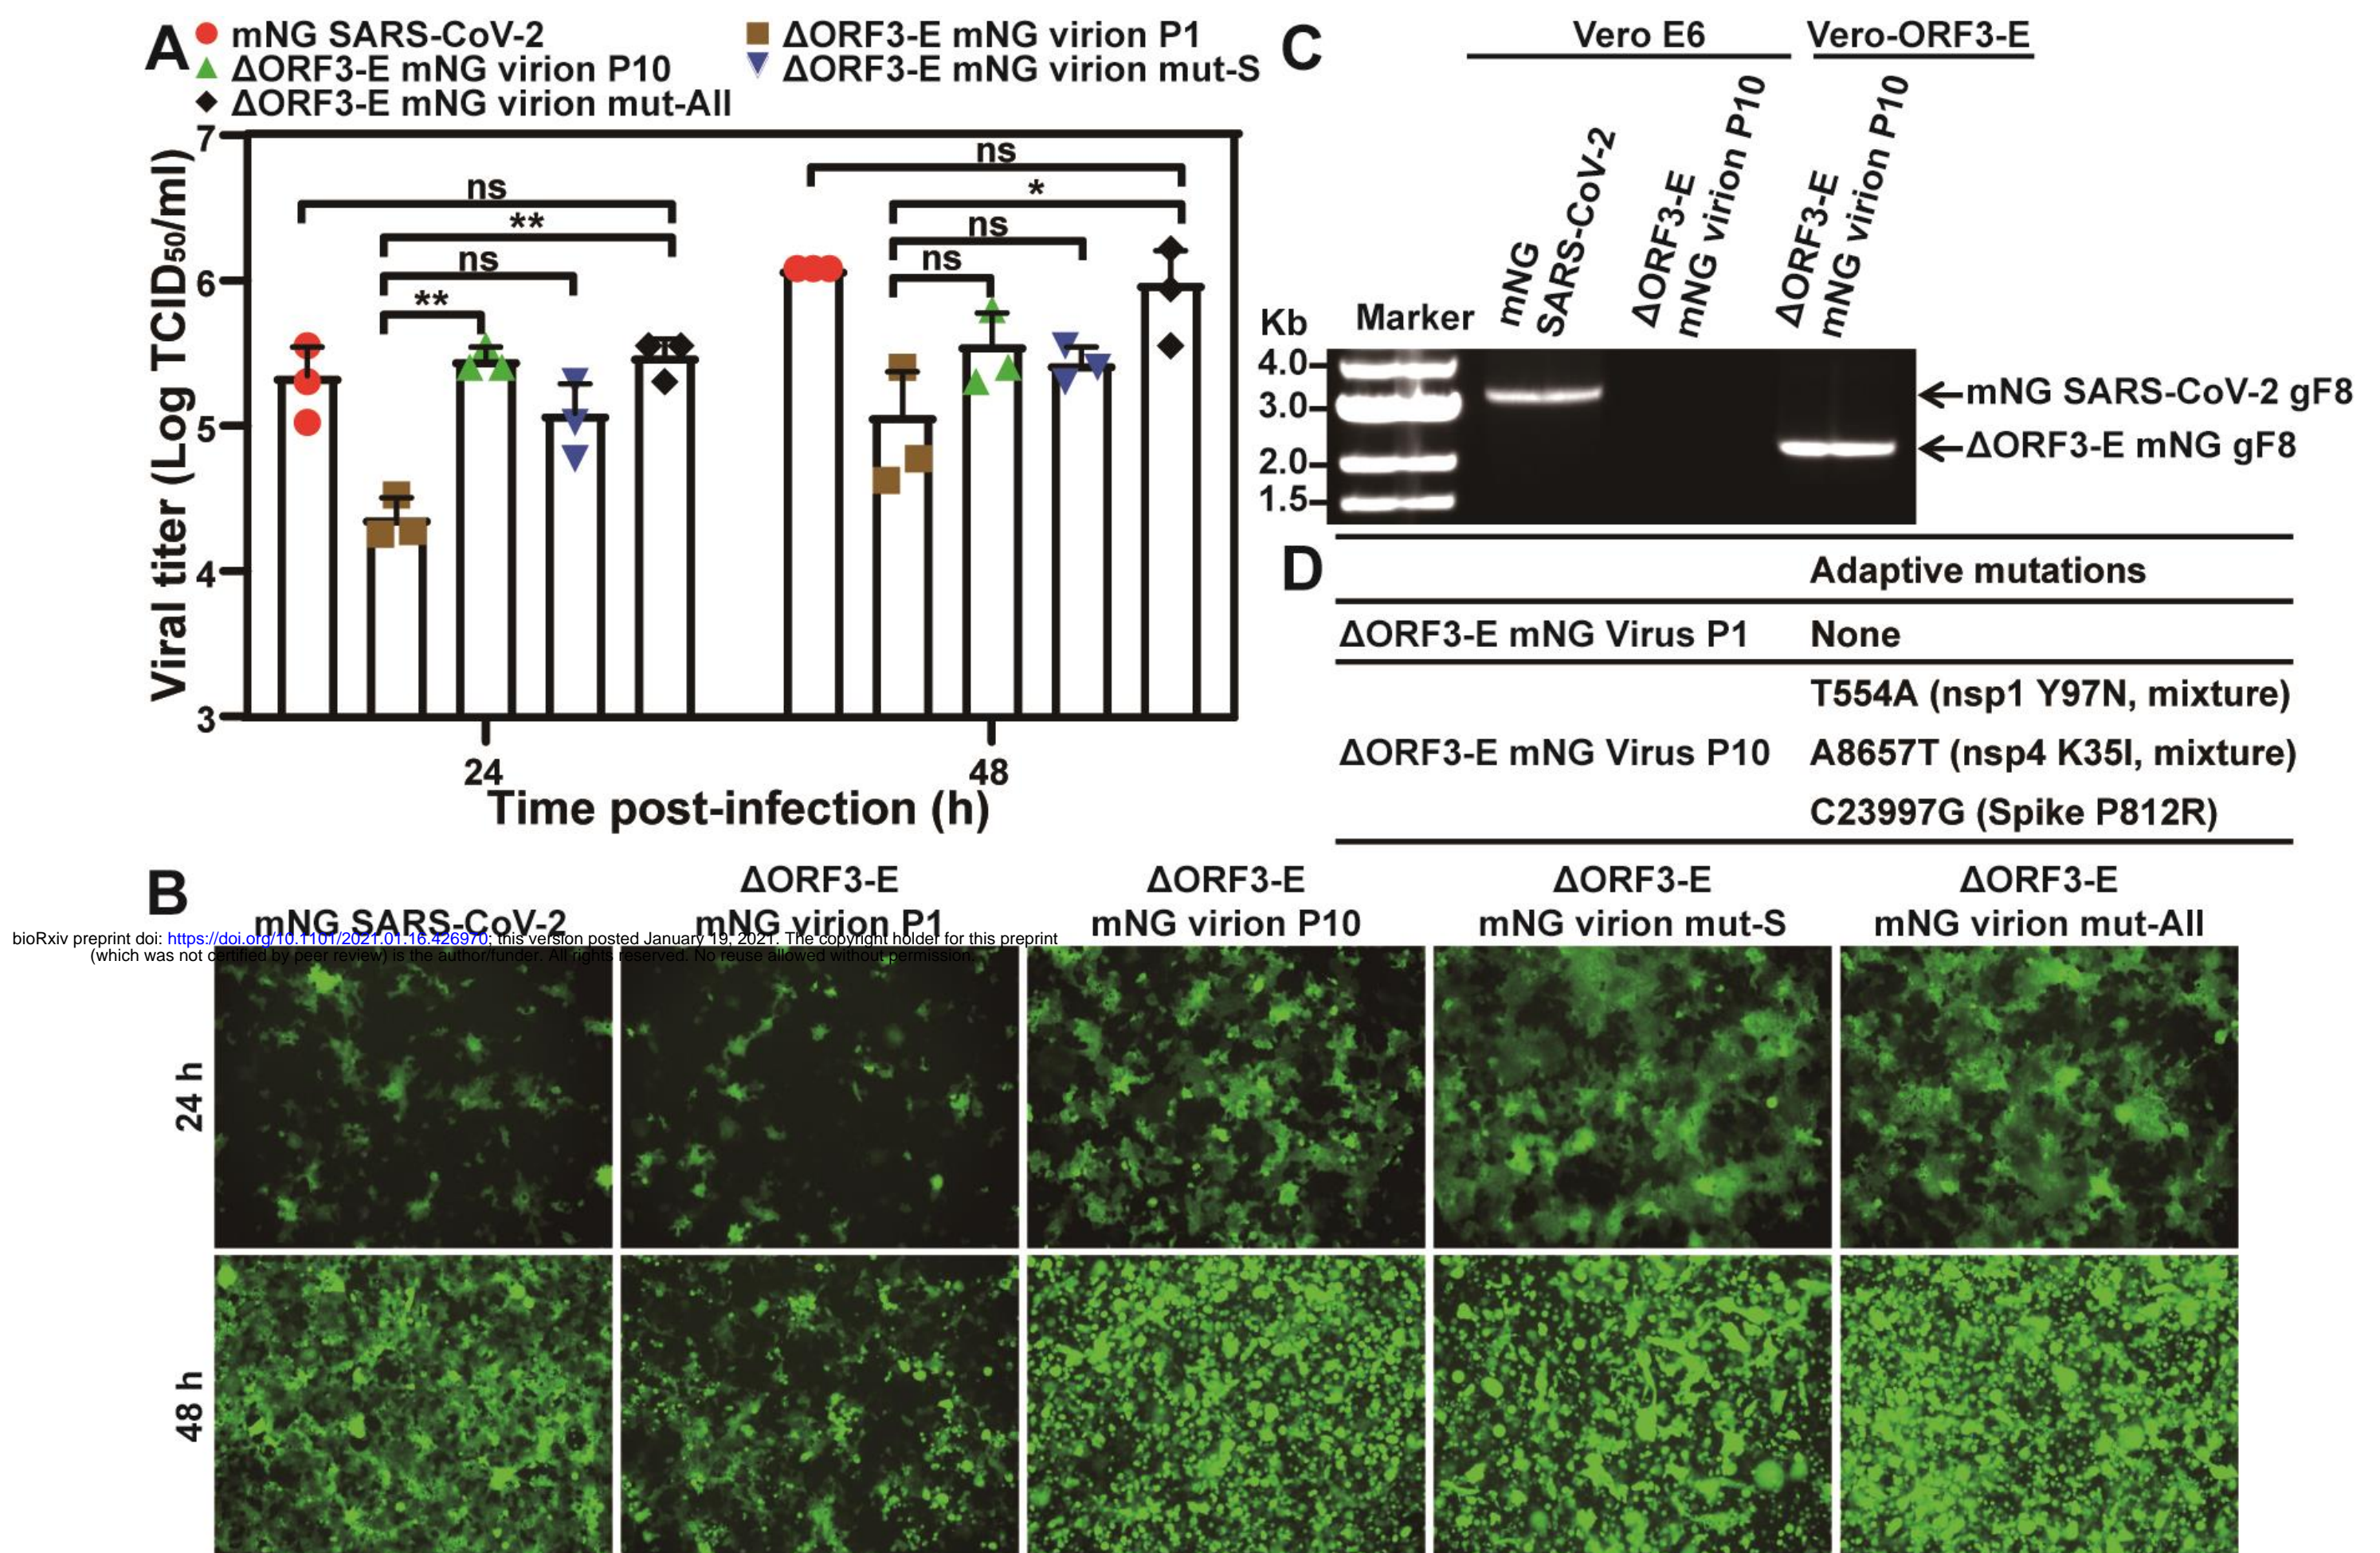

**Figure 3**

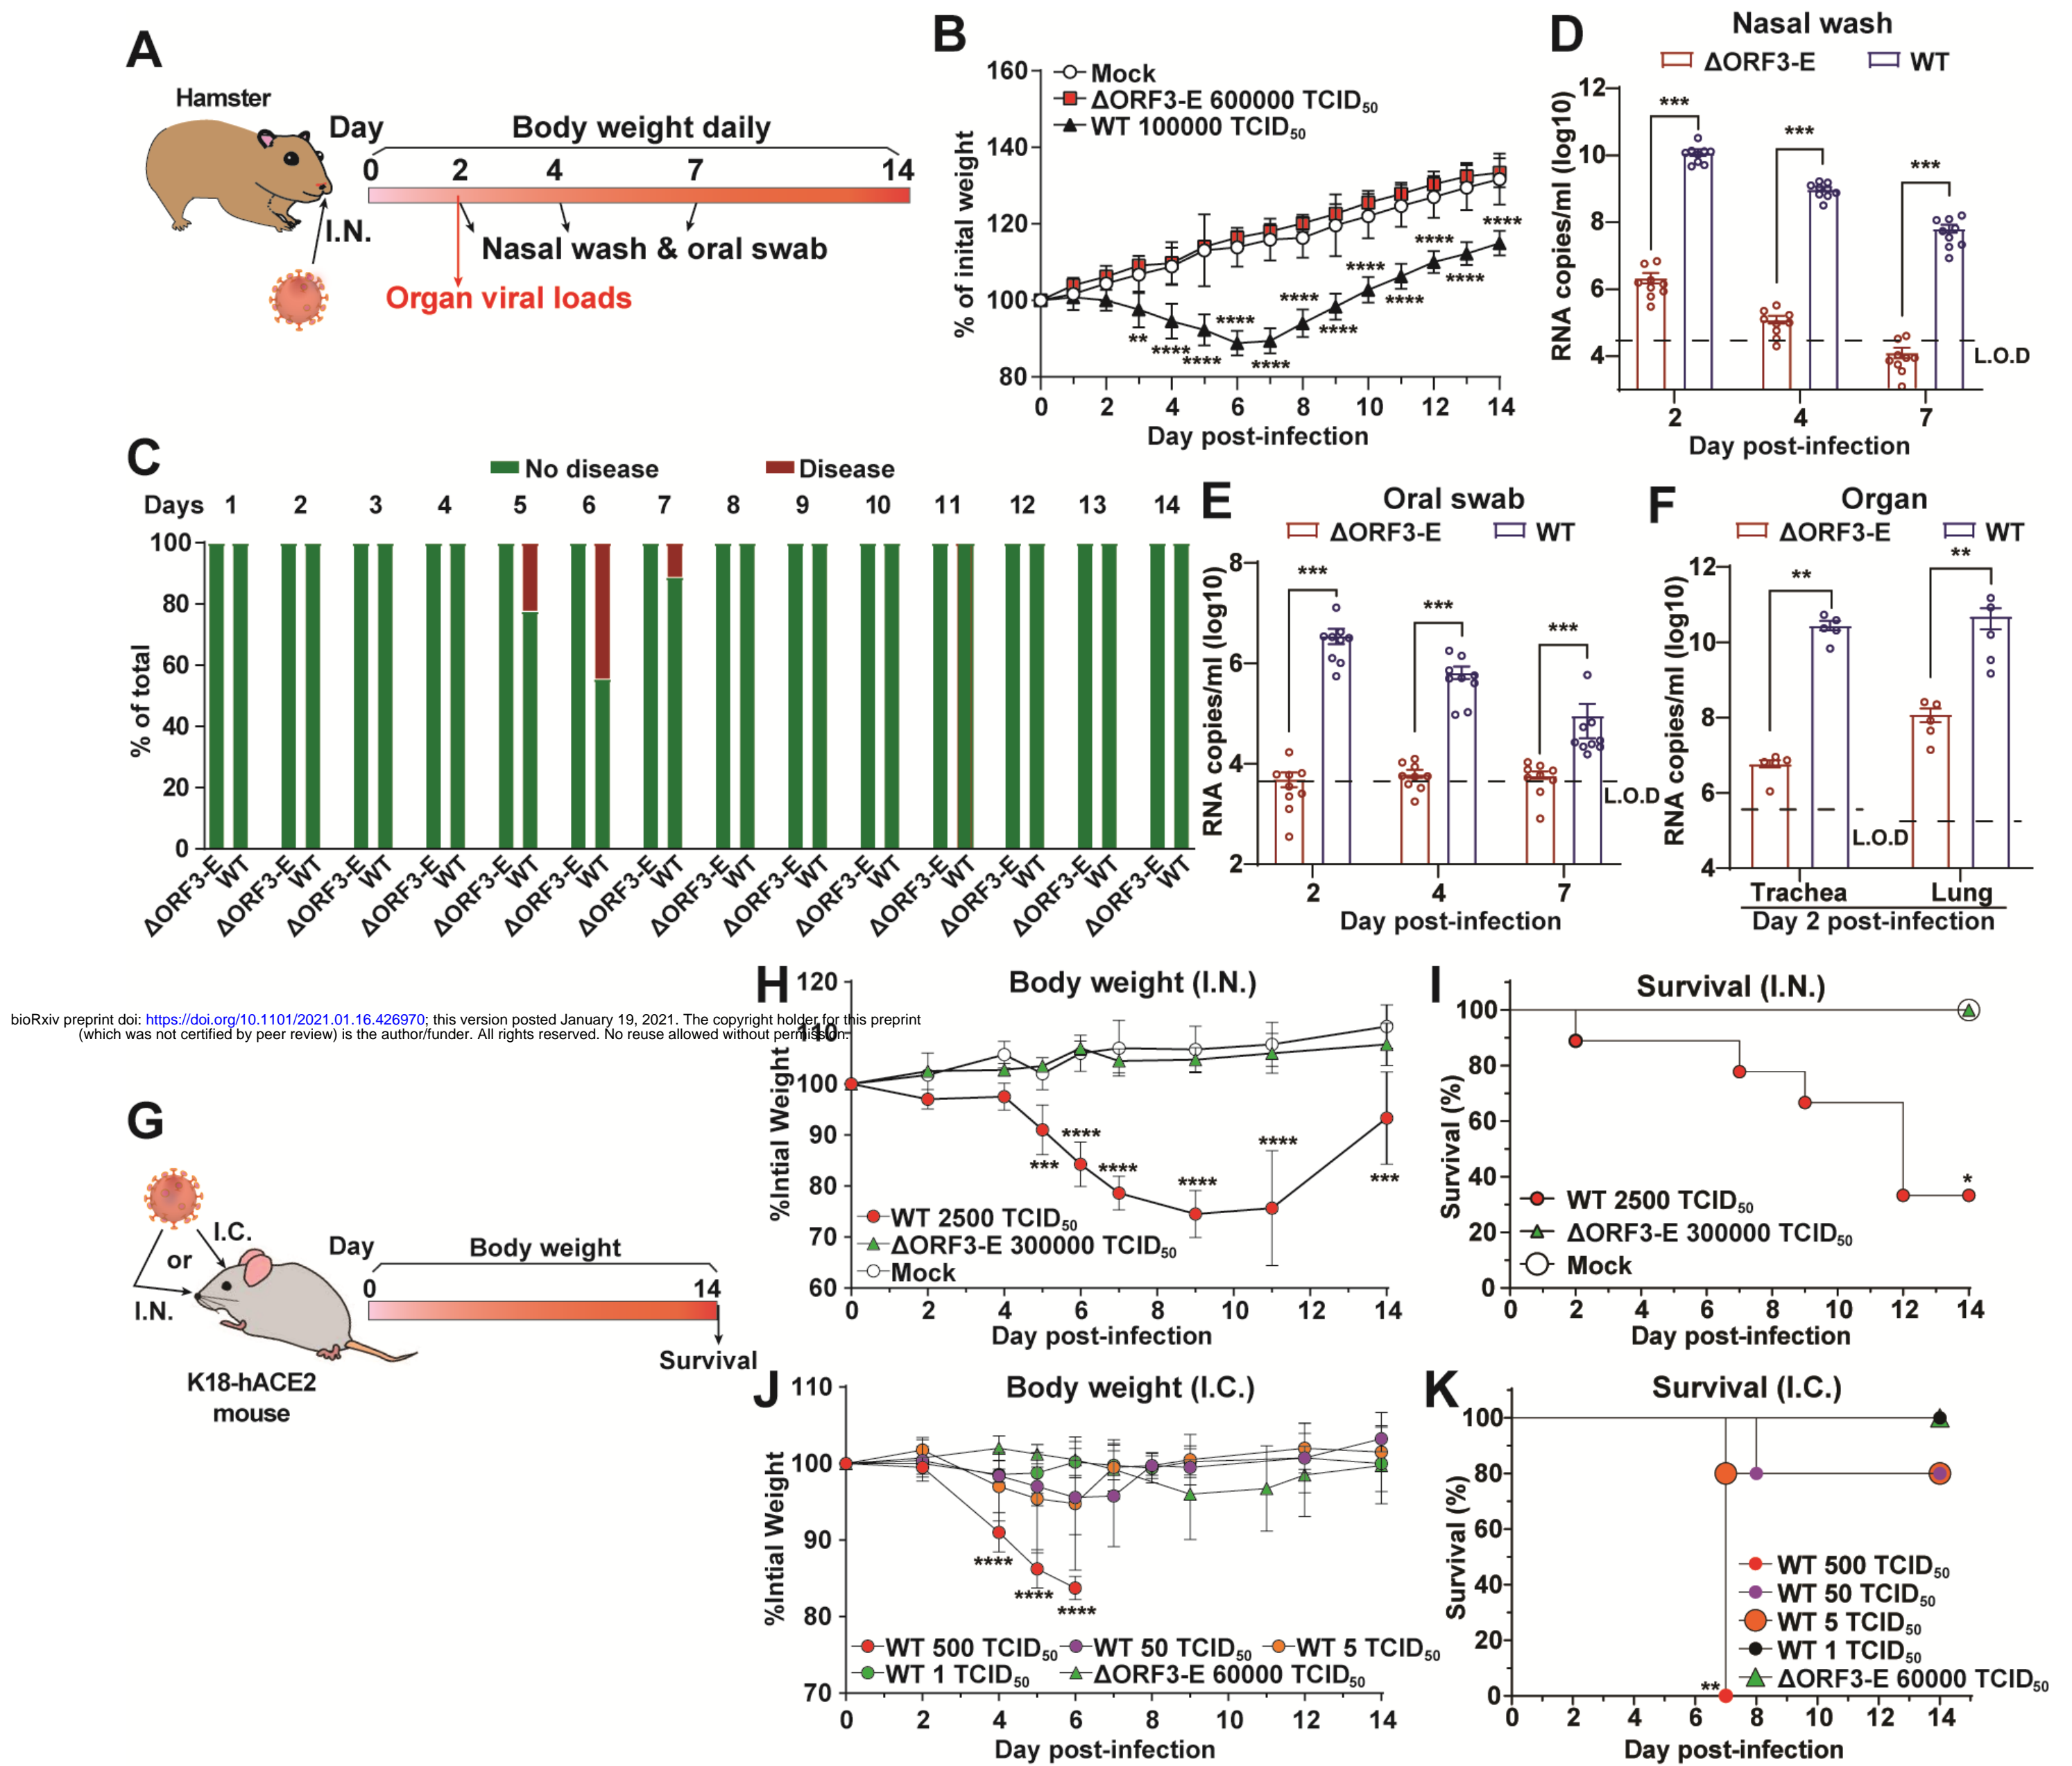

**Figure 4**

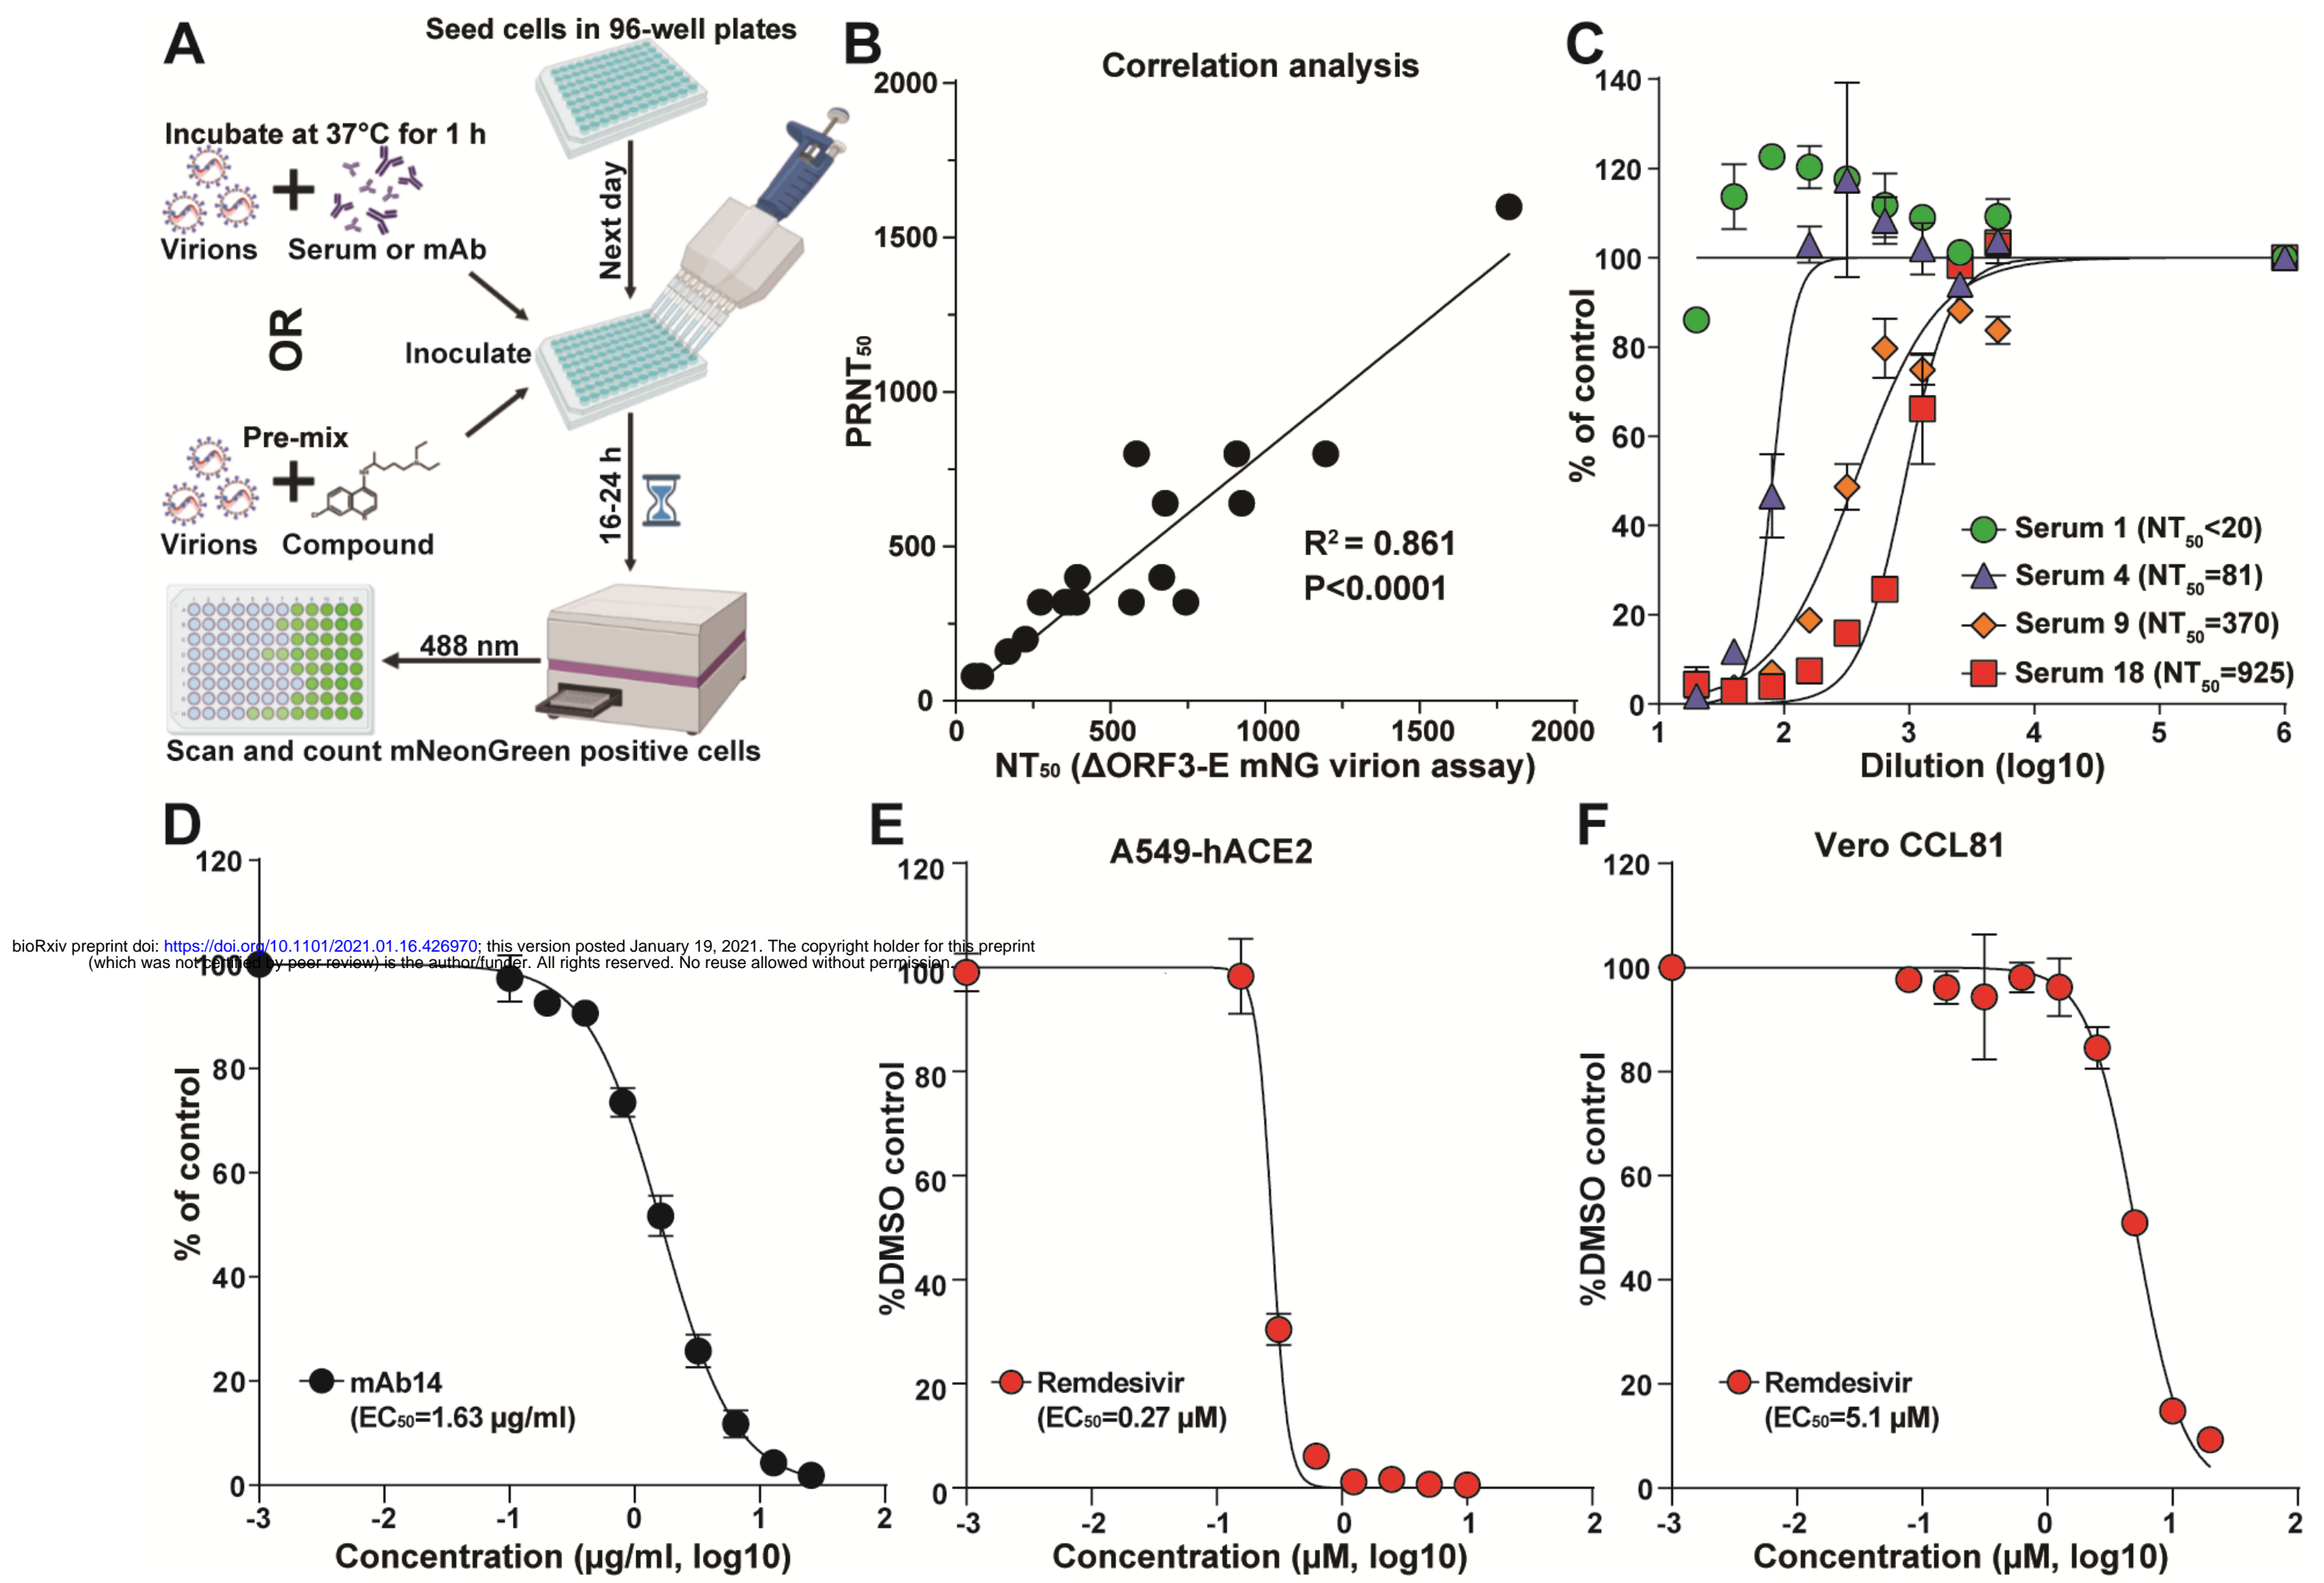

Figure S1

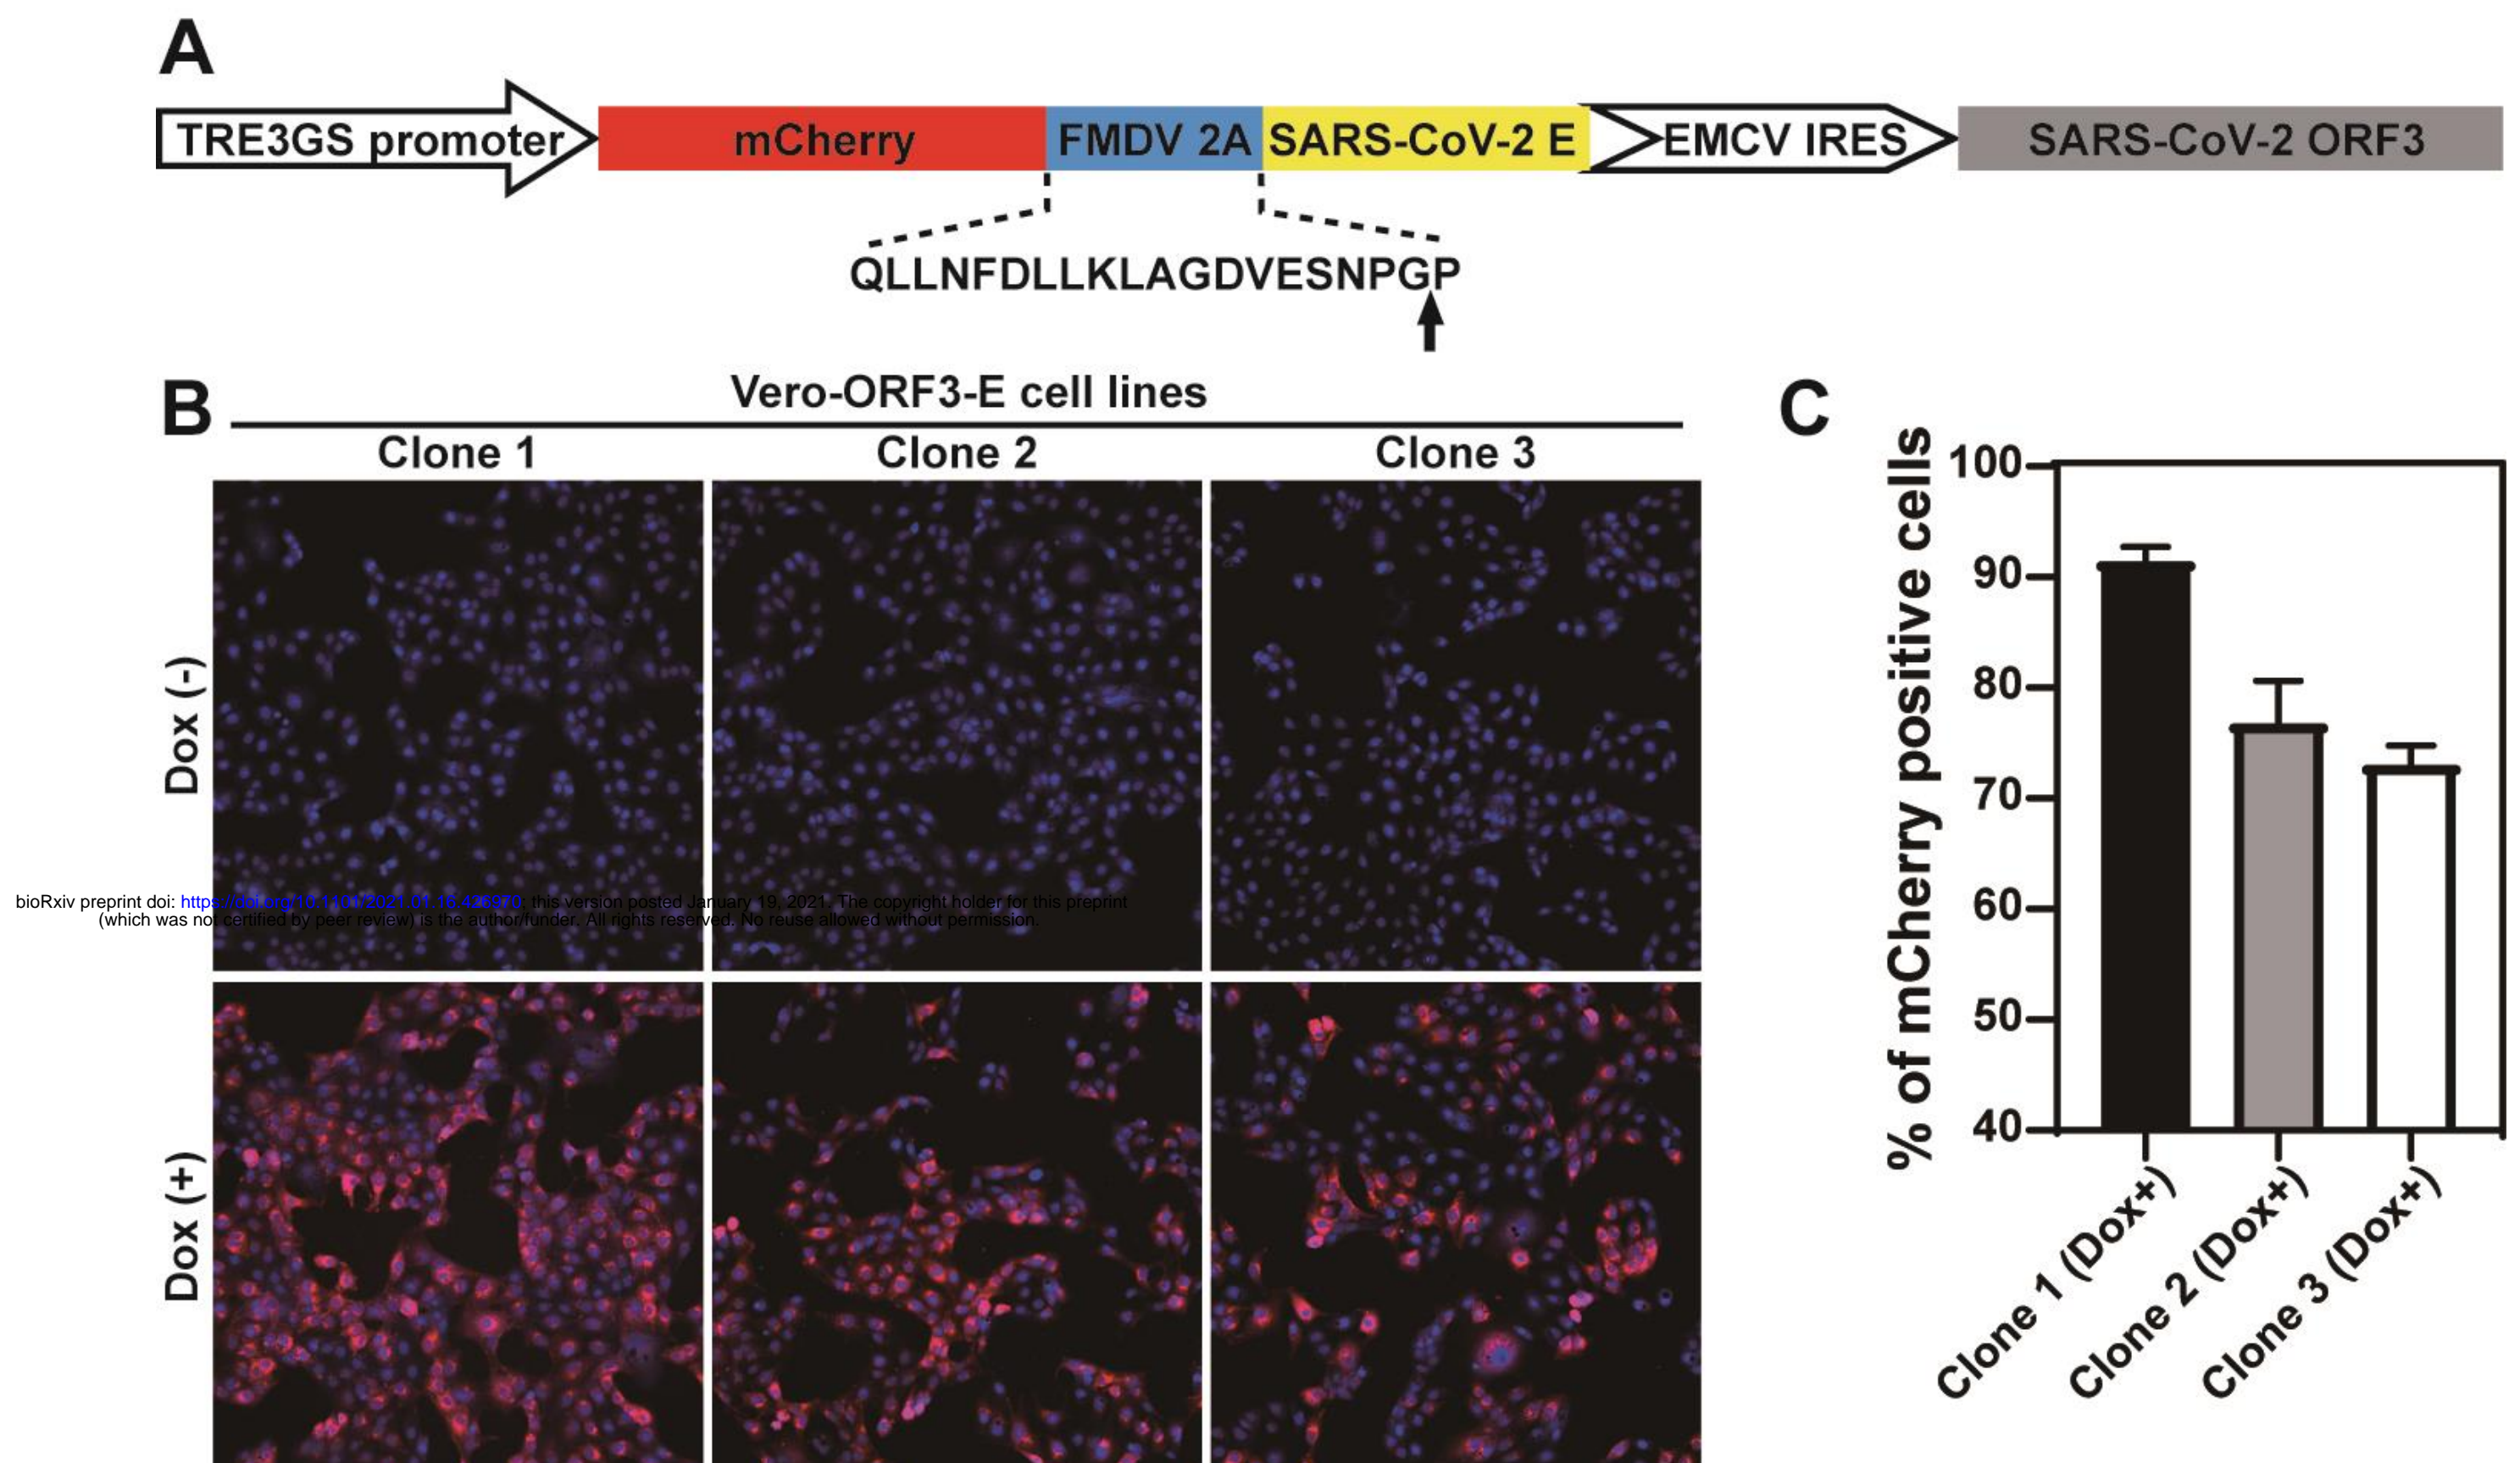



# Figure S2

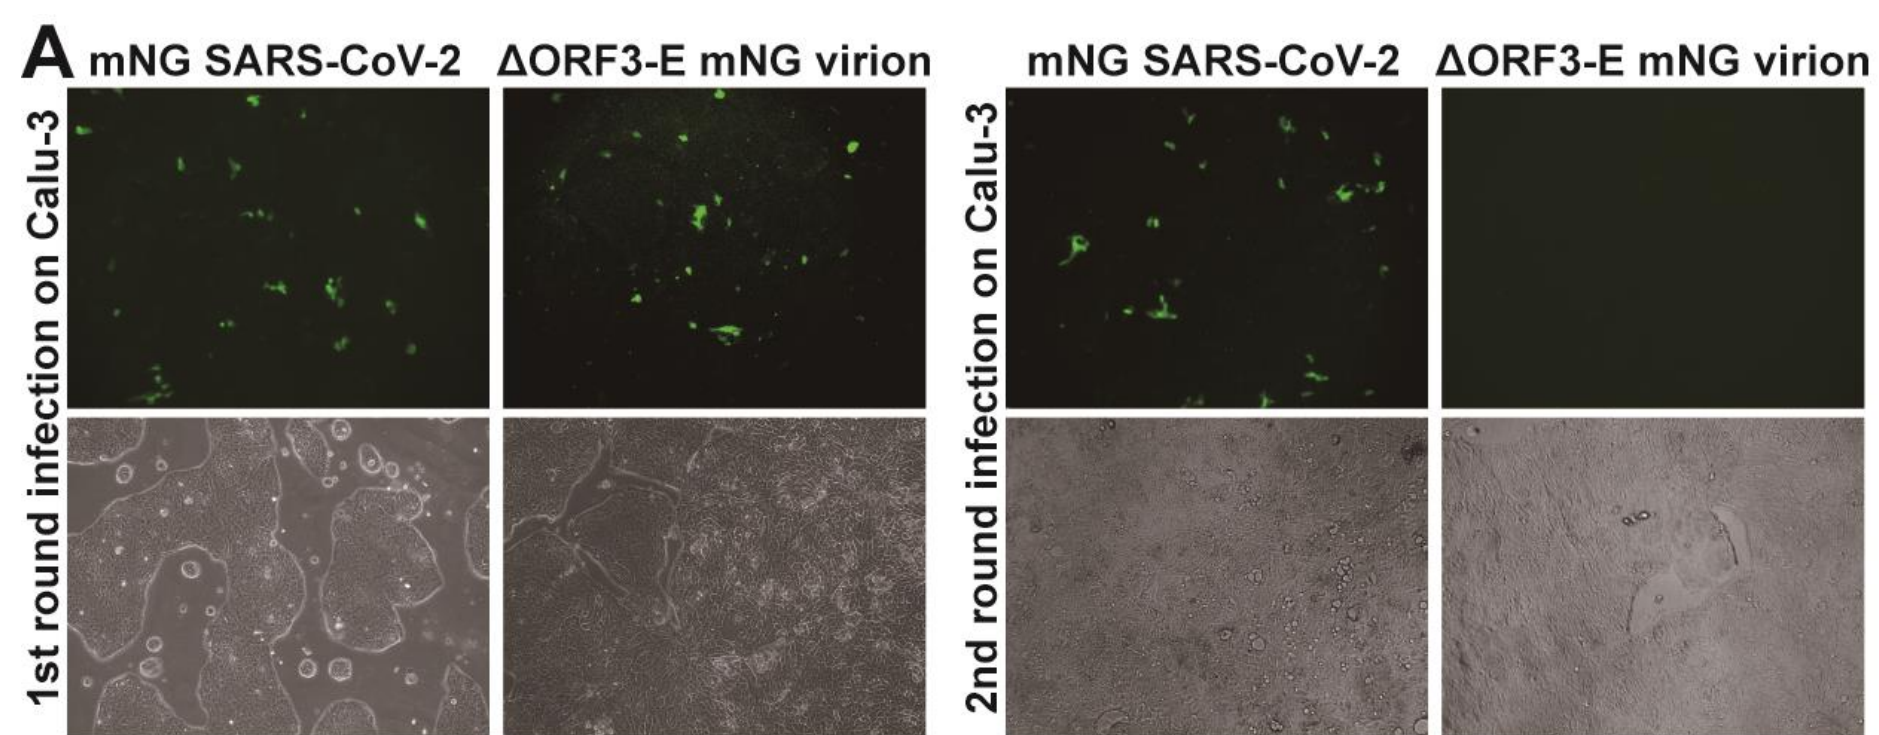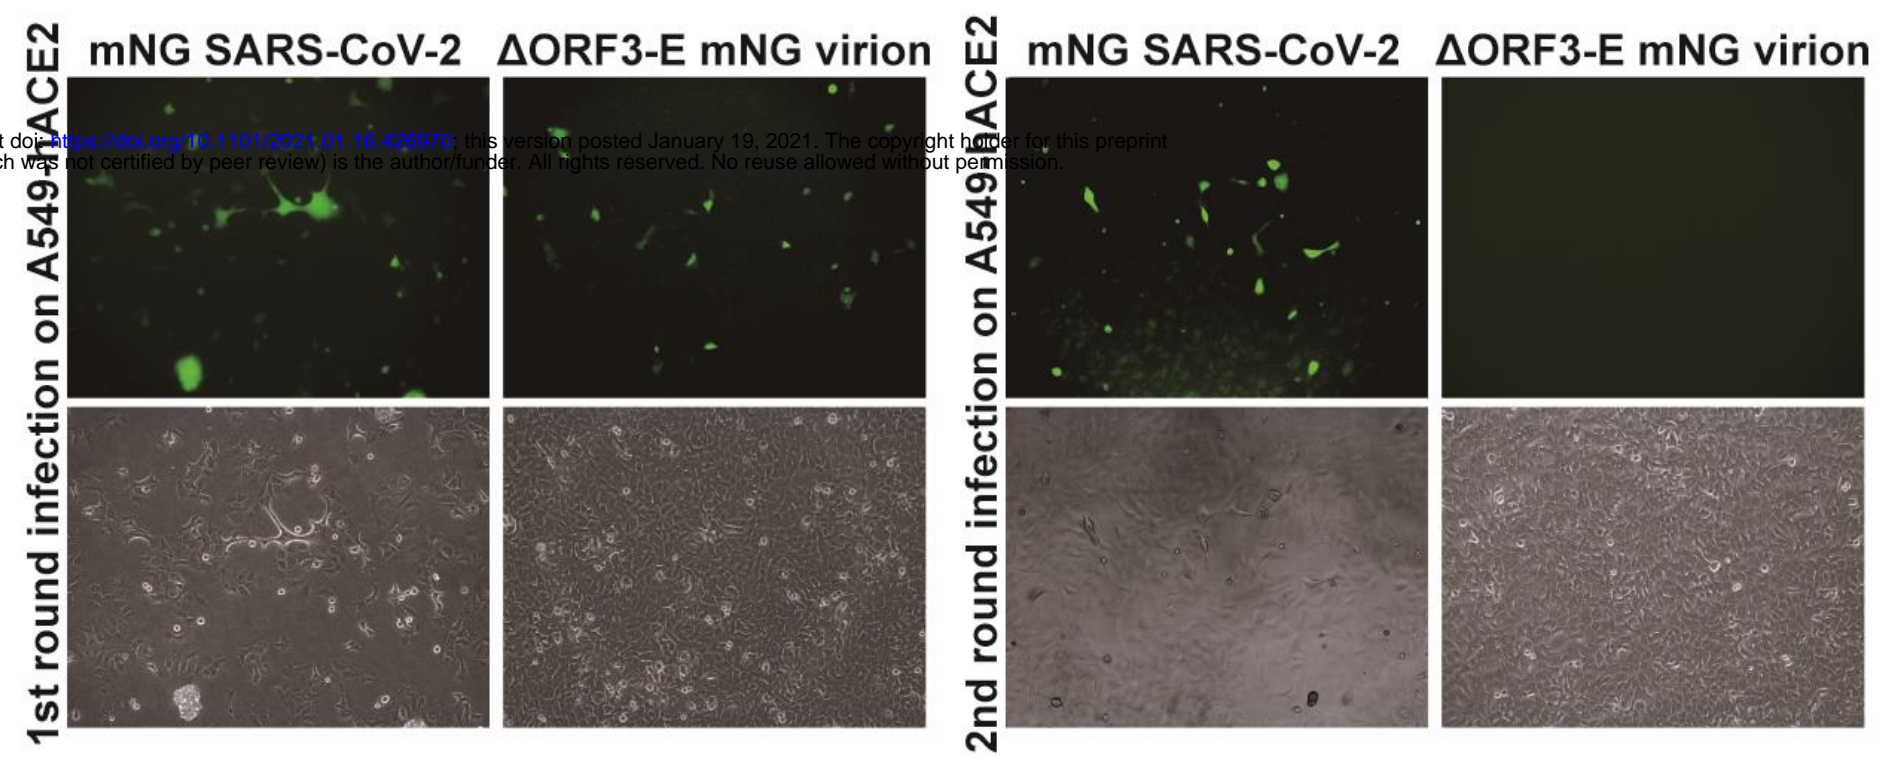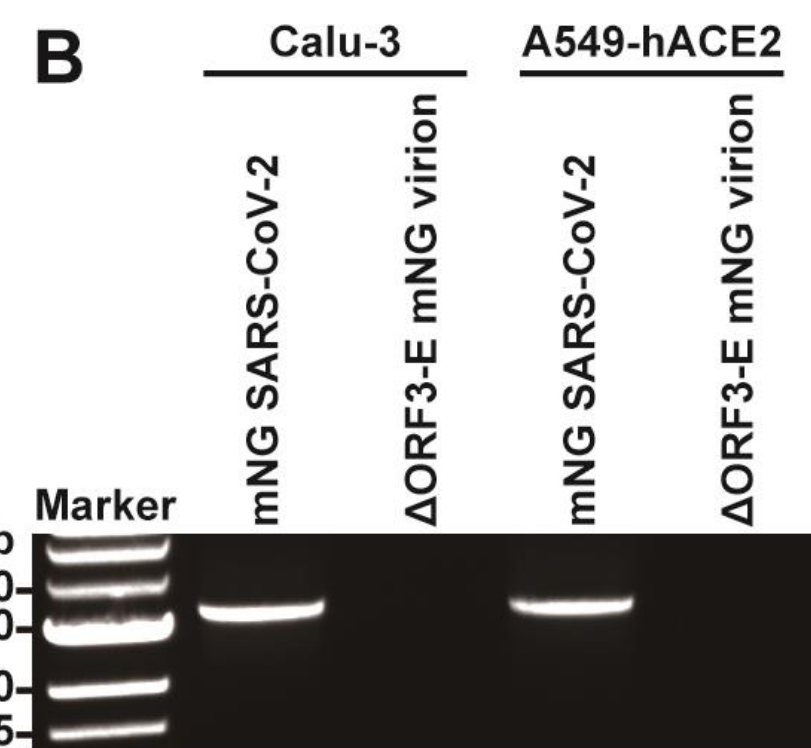

Figure S3

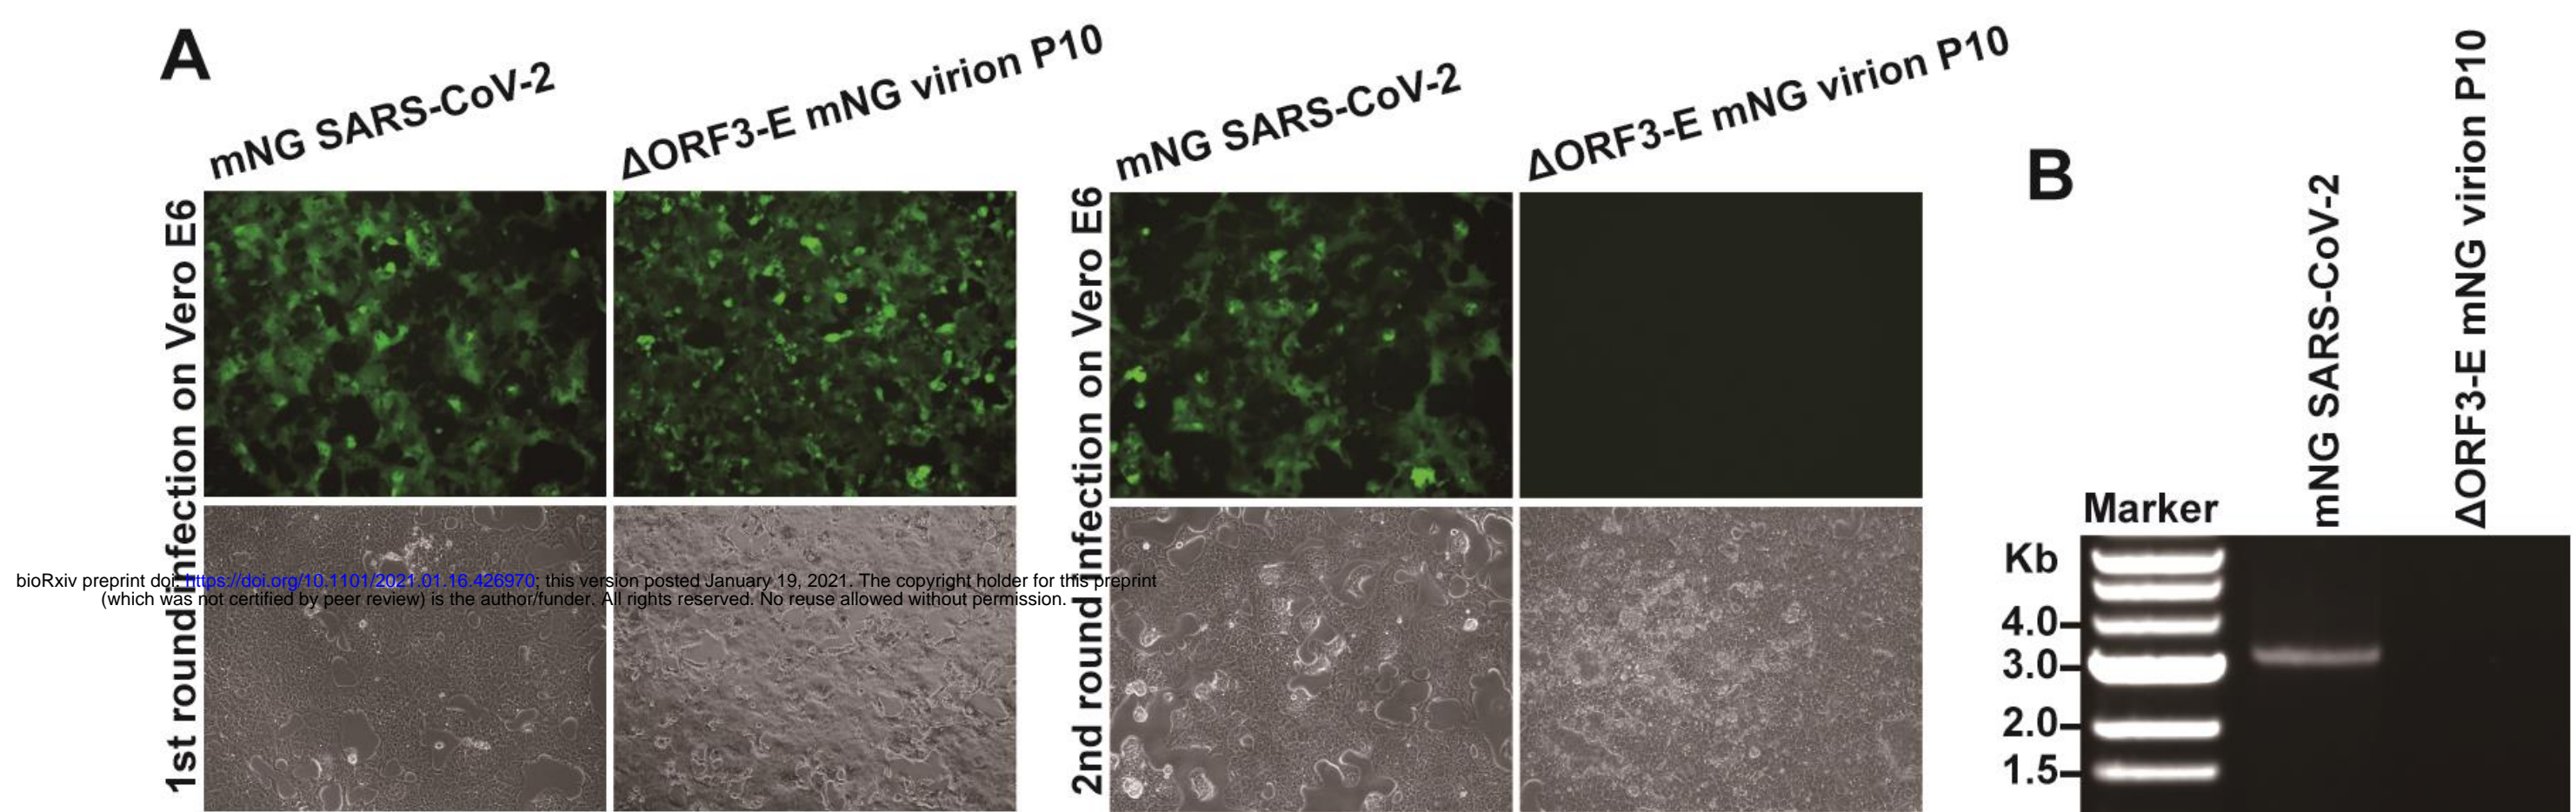

**Figure S4**

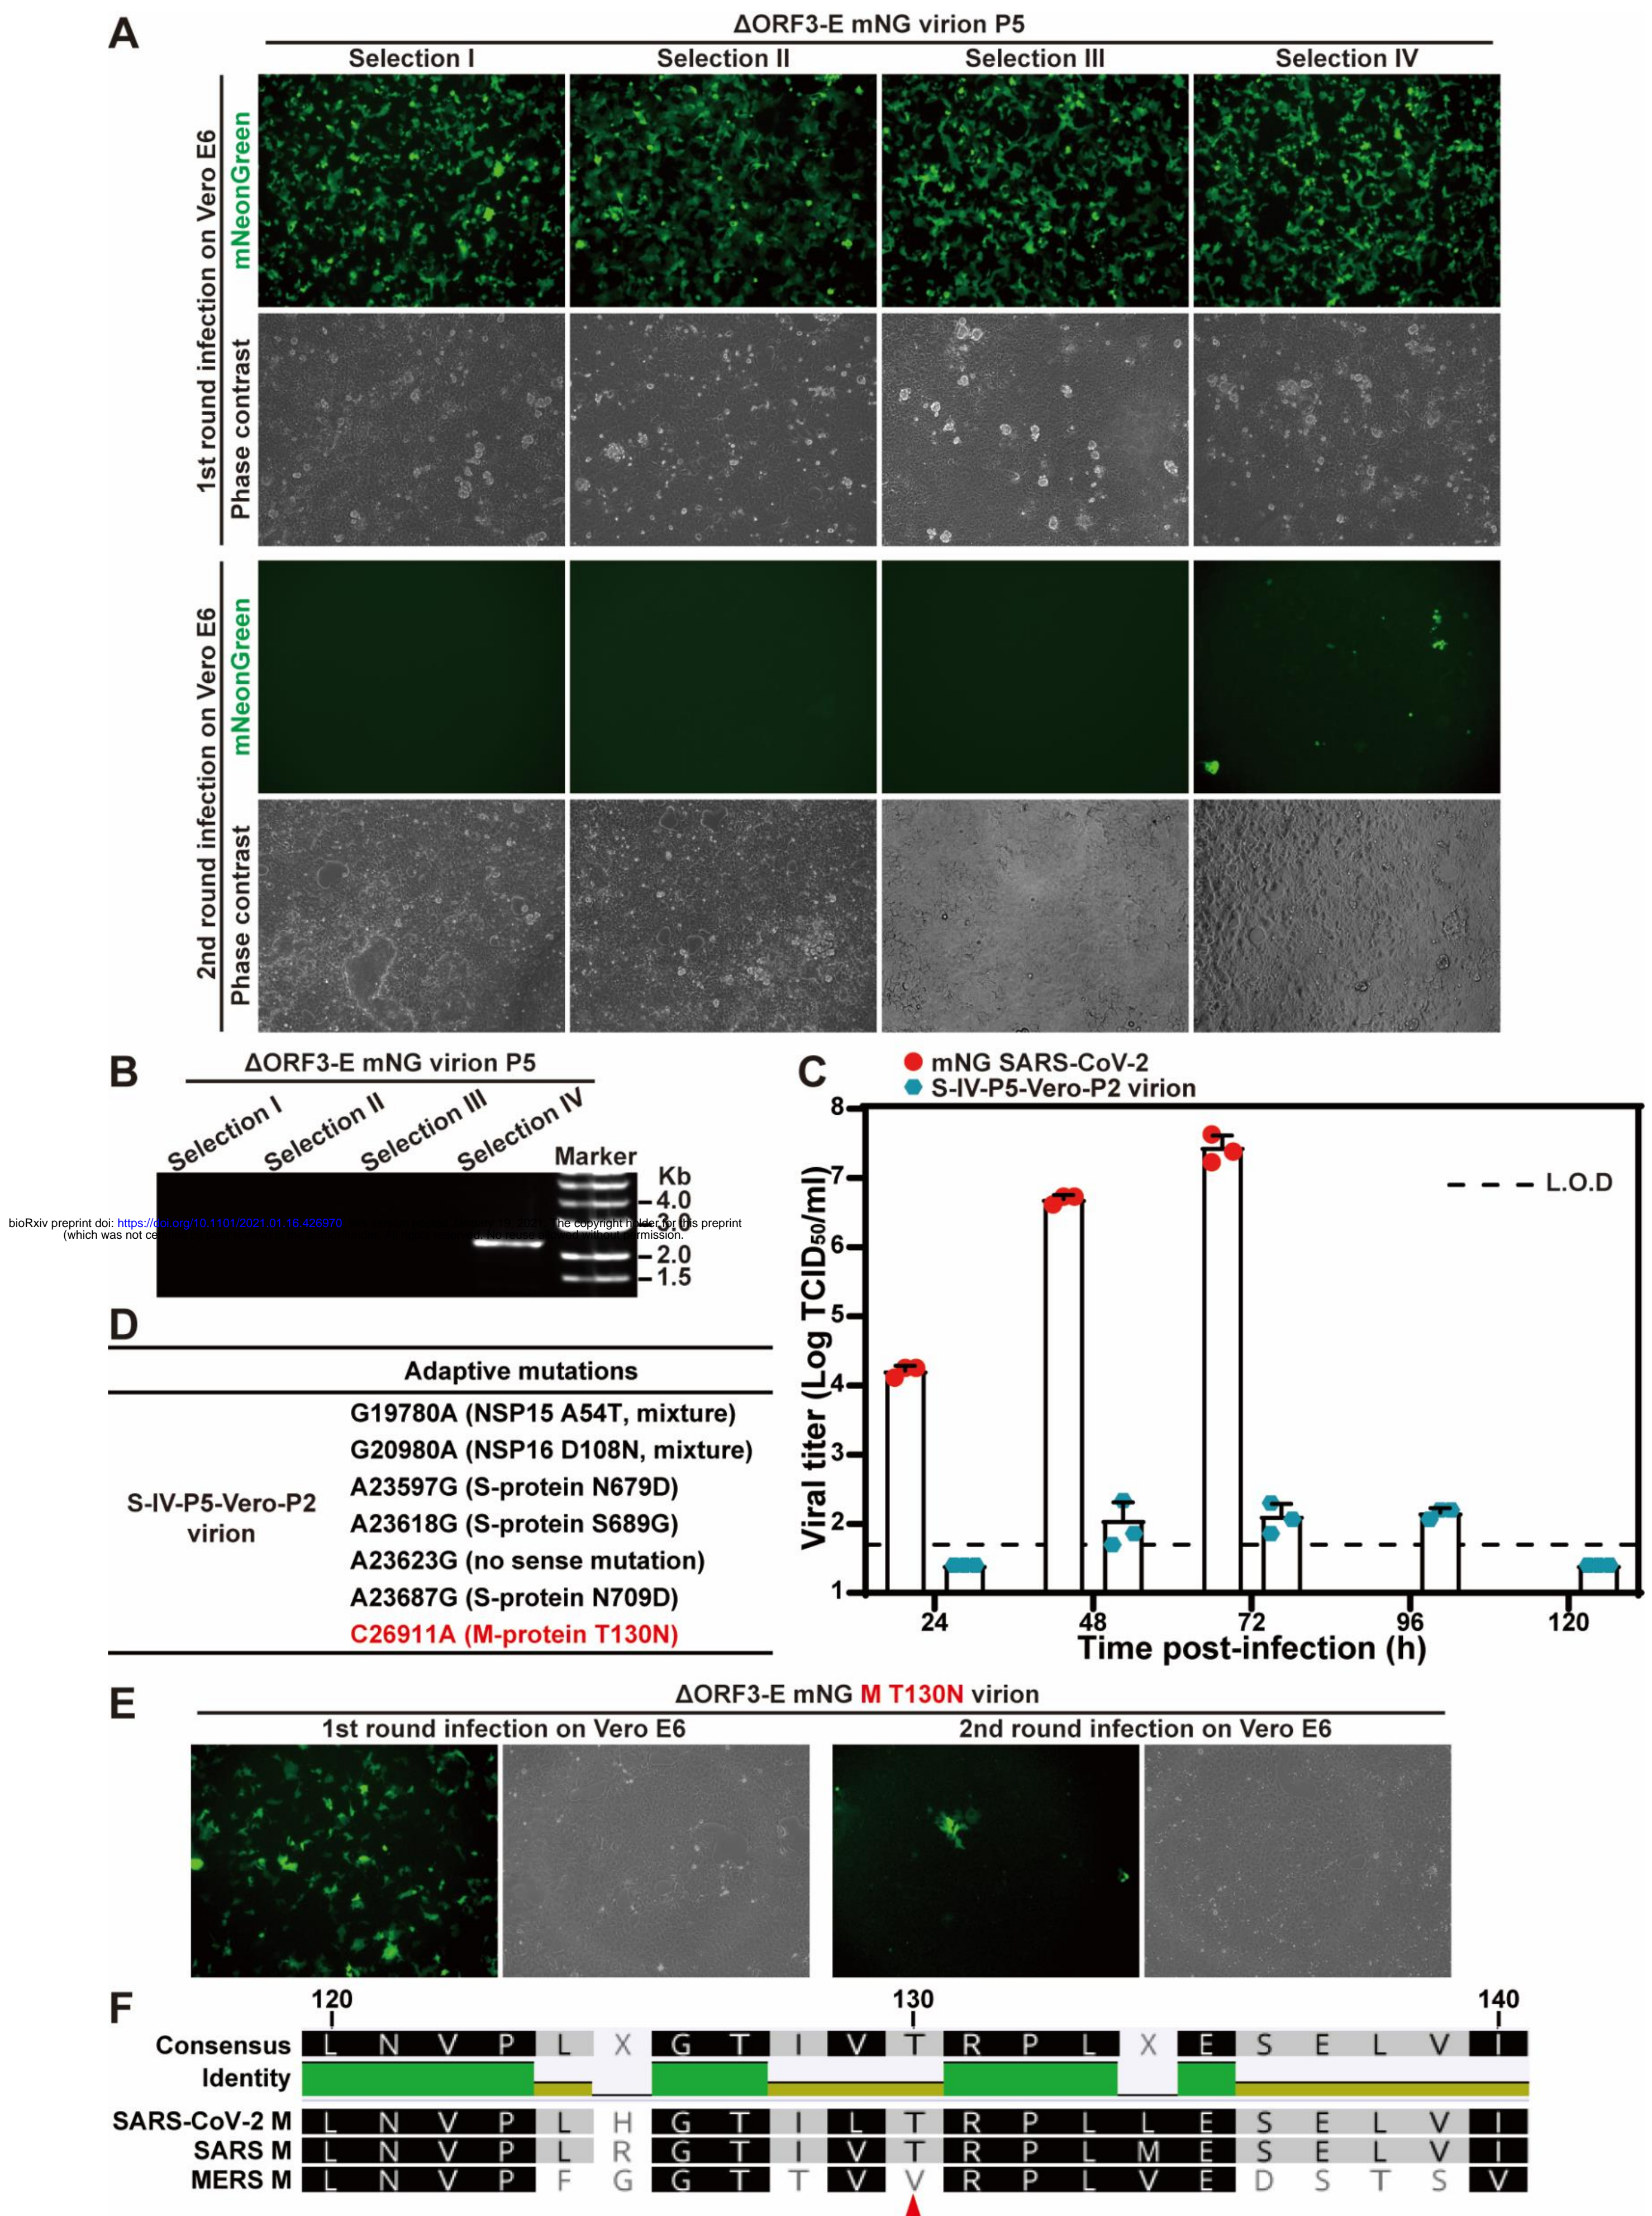

Figure S5

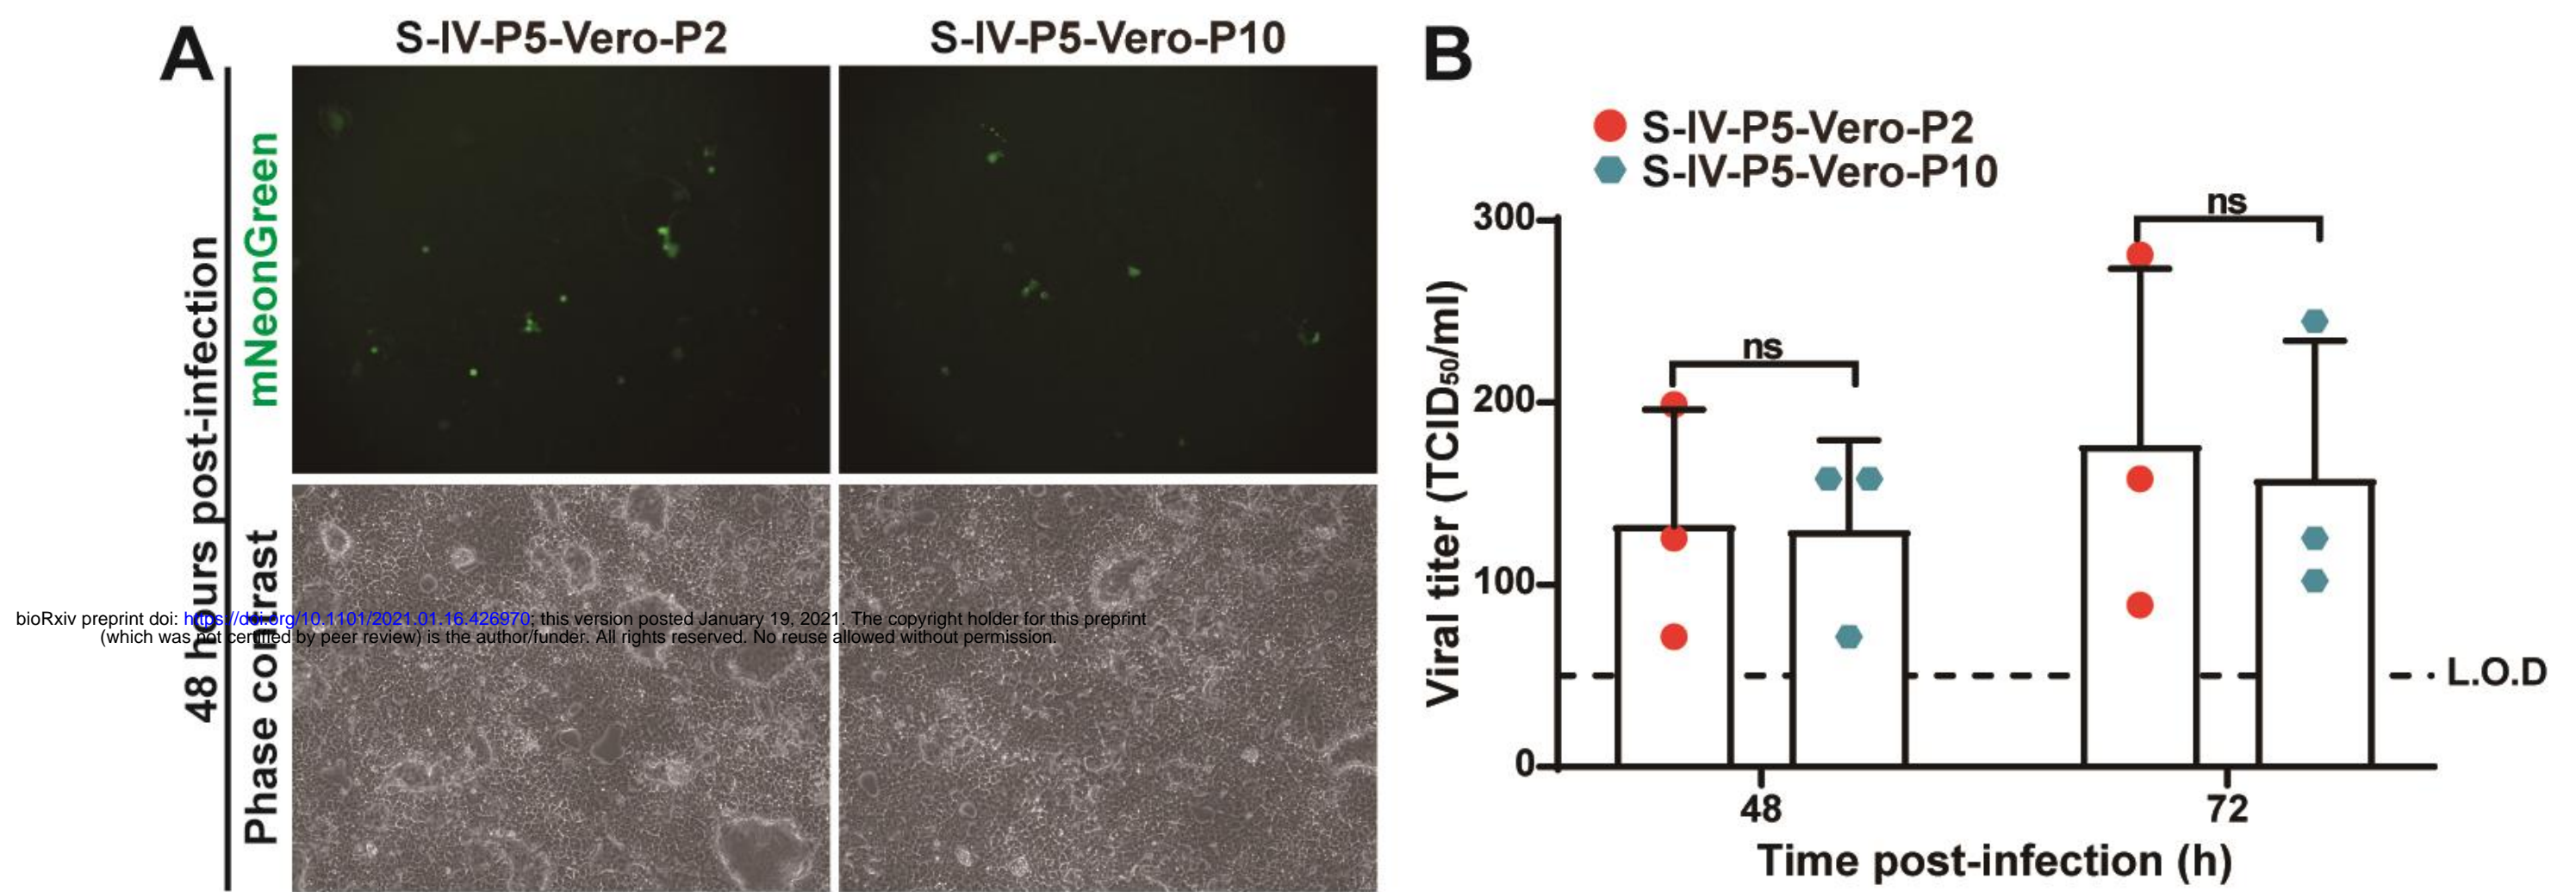

Figure S6

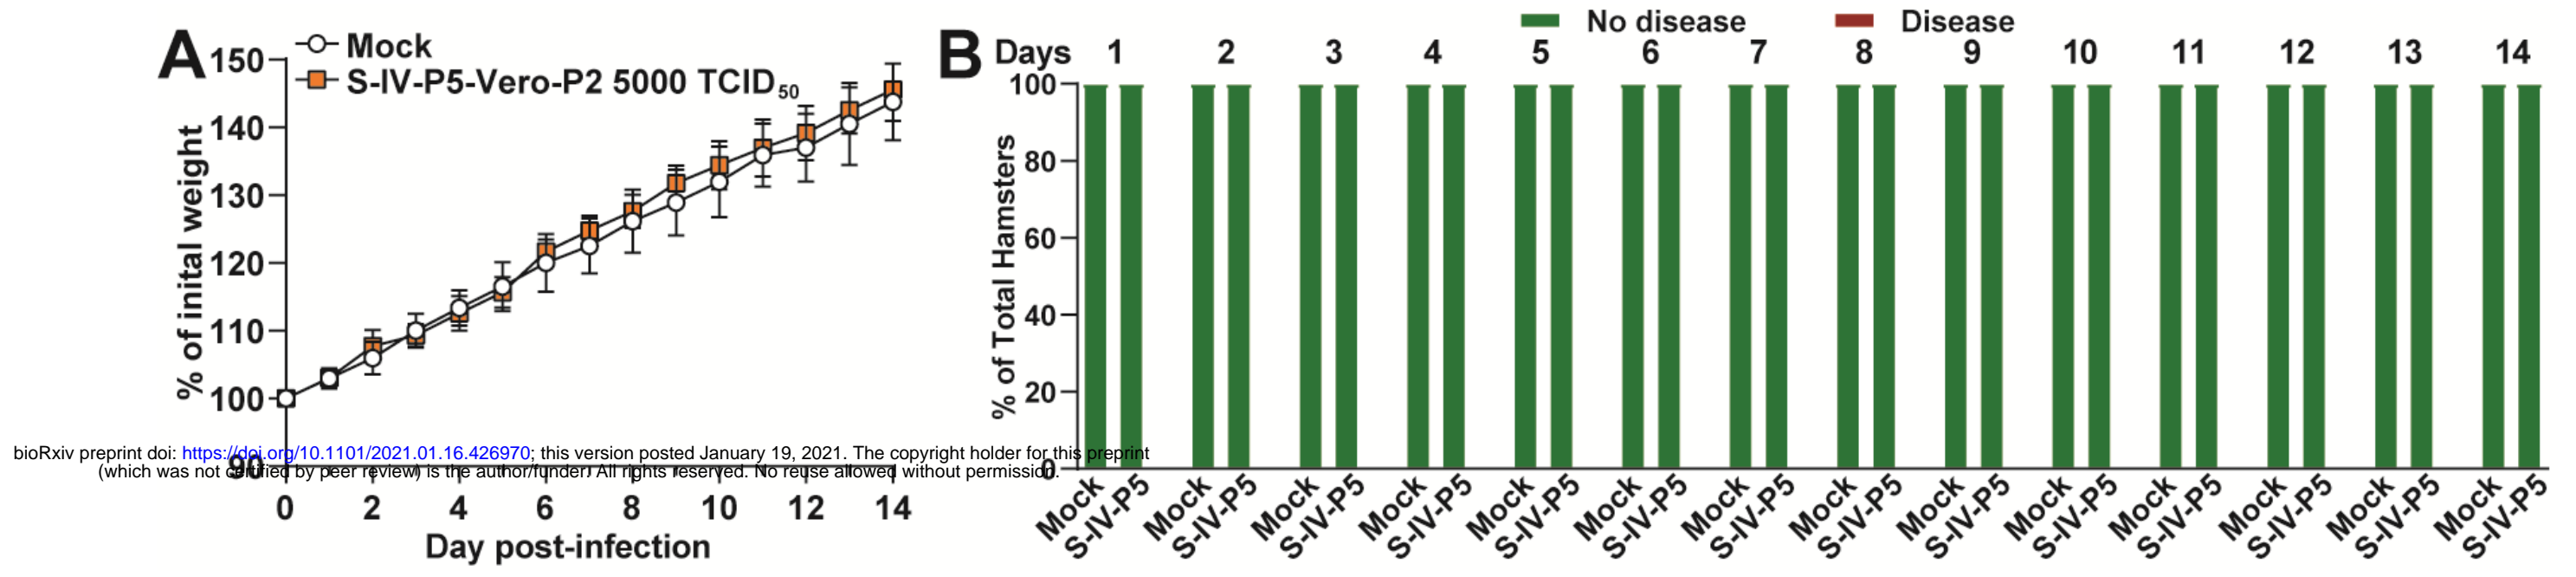

Figure S7

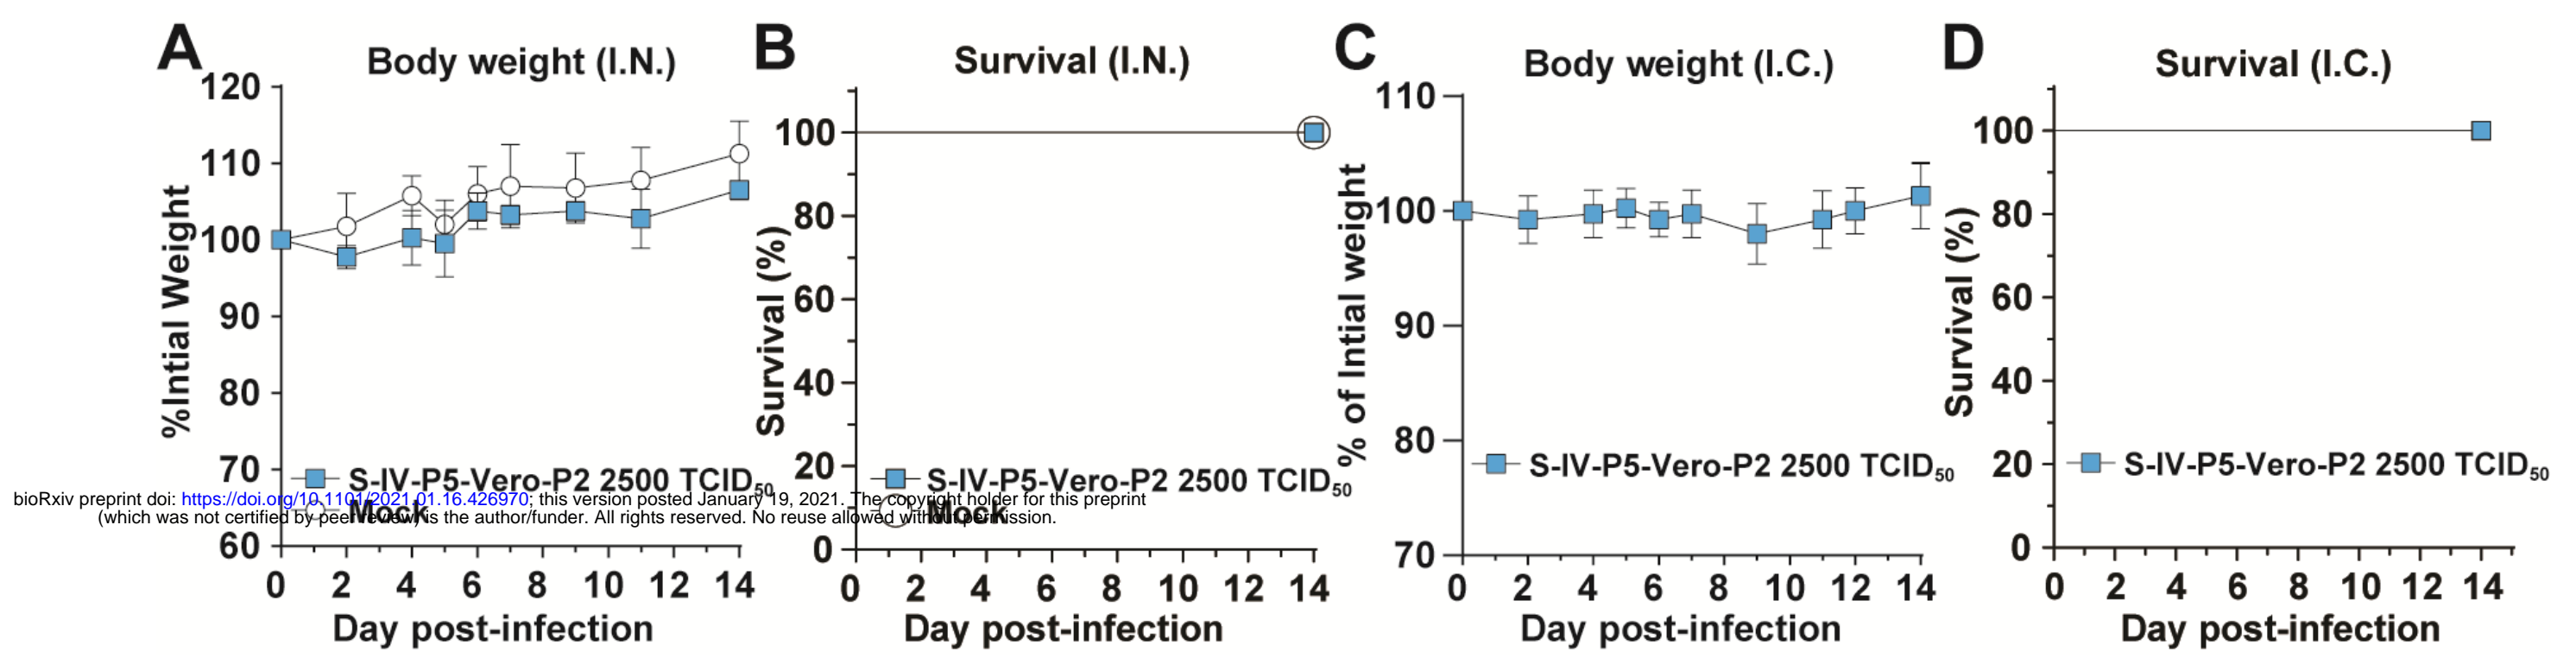

Source: https://www.biorxiv.org/content/10.1101/2021.01.16.426970v1.full.pdf
